# Supplementary material
Source: PubMed Central journal article supplement (PMC4737931)
Supplement: ismej2015121x1.pdf [file ismej2015121x1.pdf]

Supplementary Table S1: Biogeochemistry of samples obtained pre-, during, and post-discharge.

|                          | Sample ID     | CDOM | Methane (nM) | Ethane (nM) | Propane (nM) | i-Butane (nM) | Butane (nM) | Pentane (nM) | Methane Oxidation |                                 |
|--------------------------|---------------|------|--------------|-------------|--------------|---------------|-------------|--------------|-------------------|---------------------------------|
|                          |               |      |              |             |              |               |             |              | Rate (nmol/L/d)   | CH <sub>4</sub> turnover (days) |
| Pre-DC                   | 1-PRE-MC118   | nd   | nd           | nd          | nd           | nd            | nd          | nd           | nd                | nd                              |
|                          | 2-PRE-MC118   | nd   | nd           | nd          | nd           | nd            | nd          | nd           | nd                | nd                              |
| During DWH oil discharge | 3-DUR-MC250   | 0.18 | 428          | 29          | 46           | 863           | 195         | 4            | 7.0               | 61.0                            |
|                          | 4-DUR-MC250   | 0.25 | 210171       | 20338       | 15156        | 2965          | 3946        | 1238         | 2769.8            | 75.9                            |
|                          | 5-DUR-MC250   | 0.18 | 160139       | 15592       | 10079        | 2472          | 2923        | 968          | 1643.2            | 97.5                            |
|                          | 6-DUR-MC335   | 0.20 | 103654       | 9343        | 1688         | 162           | 39          | bdl          | 1666.8            | 62.2                            |
|                          | 7-DUR-MC295   | 0.37 | 160316       | 15546       | 10536        | 1943          | 3685        | 22           | 1030.9            | 155.5                           |
|                          | 8-DUR-MC295   | 0.49 | 26           | bdl         | bdl          | bdl           | bdl         | bdl          | 0.5               | 57.1                            |
|                          | 9-DUR-MC252   | 0.81 | 104529       | 649         | 578          | 274           | 559         | 357          | 1984.0            | 52.7                            |
|                          | 10-DUR-MC252  | 0.15 | 850          | 22136       | 15374        | 2956          | 6649        | 3813         | 12.9              | 66.0                            |
|                          | 11-DUR-MC252  | 0.13 | 6            | bdl         | bdl          | bdl           | bdl         | bdl          | 0.1               | 49.4                            |
|                          | 12-DUR-MC252  | 0.38 | 122459       | 12055       | 8476         | 1692          | 3964        | 3497         | 1808.8            | 67.7                            |
|                          | 13-DUR-MC205  | 0.08 | 42           | bdl         | 1            | 22            | 8           | 8            | 0.4               | 104.0                           |
| Post-discharge           | 14-POST-MC422 | nd   | 1            | nd          | nd           | nd            | nd          | nd           | 0.1               | 13.5                            |
|                          | 15-POST-MC298 | nd   | 0            | nd          | nd           | nd            | nd          | nd           | 0.0               | 19.5                            |
|                          | 16-POST-MC297 | nd   | 11           | nd          | nd           | nd            | nd          | nd           | 0.0               | nd                              |
|                          | 17-POST-GC600 | nd   | 758          | nd          | nd           | nd            | nd          | nd           | 2.7               | 282.8                           |
|                          | 18-POST-GC600 | nd   | 824          | nd          | nd           | nd            | nd          | nd           | 314.2             | 2.6                             |
|                          | 19-POST-MC252 | nd   | 2            | nd          | nd           | nd            | nd          | nd           | 2.7               | 0.7                             |
|                          | 20-POST-MC253 | nd   | 0            | nd          | nd           | nd            | nd          | nd           | 0                 | 0                               |

(table continued on next page)

Supplementary Table S1 (continued): Biogeochemistry of samples obtained pre-, during, and post-discharge.

|                          | Sample ID     | Cell Counts<br>(cells/mL) | DOC (uM) | DIC (mM) | delta-DIC | NH <sub>4</sub> (uM) | NOx (uM) | PO <sub>4</sub> <sup>3-</sup> (uM) | DO (uM) | pH   |
|--------------------------|---------------|---------------------------|----------|----------|-----------|----------------------|----------|------------------------------------|---------|------|
| Pre-DC                   | 1-PRE-MC118   | nd                        | nd       | nd       | nd        | nd                   | nd       | nd                                 | 168     | nd   |
|                          | 2-PRE-MC118   | nd                        | nd       | nd       | nd        | nd                   | nd       | nd                                 | 168     | nd   |
| During DWH oil discharge | 3-DUR-MC250   | 1.57E+05                  | 69       | nd       | nd        | 0.94                 | 31.27    | 2.05                               | 223     | 7.39 |
|                          | 4-DUR-MC250   | 6.92E+05                  | 79       | nd       | nd        | 1.10                 | 19.51    | 1.45                               | 221     | 6.94 |
|                          | 5-DUR-MC250   | 3.49E+05                  | 67       | nd       | nd        | 1.10                 | 26.09    | 1.79                               | 247     | 6.51 |
|                          | 6-DUR-MC335   | 1.59E+06                  | nd       | 2.32     | -0.14     | nd                   | 20.61    | 1.38                               | nd      | 6.93 |
|                          | 7-DUR-MC295   | 1.54E+06                  | 152      | 2.43     | -0.01     | 0.85                 | 18.02    | 1.25                               | 200     | 7.72 |
|                          | 8-DUR-MC295   | 4.05E+05                  | 139      | 2.32     | 0.21      | 0.72                 | 14.46    | 1.00                               | 198     | 7.82 |
|                          | 9-DUR-MC252   | 1.24E+06                  | 79       | 2.35     | 0.10      | 0.82                 | 21.67    | 1.65                               | 196     | nd   |
|                          | 10-DUR-MC252  | 2.88E+05                  | 71       | 2.37     | -0.06     | 0.75                 | 13.75    | 1.13                               | 230     | nd   |
|                          | 11-DUR-MC252  | 1.46E+05                  | 60       | 2.32     | -0.05     | 0.53                 | 30.61    | 2.37                               | 164     | 7.91 |
|                          | 12-DUR-MC252  | 3.58E+05                  | 65       | 2.26     | 0.15      | 1.04                 | 23.07    | 1.62                               | 231     | 7.78 |
|                          | 13-DUR-MC205  | nd                        | 83       | 2.30     | 0.08      | 0.78                 | 28.37    | 1.68                               | 219     | 7.92 |
| Post-discharge           | 14-POST-MC422 | nd                        | 67       | 2.34     | 0.10      | 0.00                 | 31.65    | 1.97                               | 227     | 7.64 |
|                          | 15-POST-MC298 | 7.23E+04                  | 45       | 2.33     | 1.12      | 0.00                 | 30.00    | 1.95                               | 199     | 7.78 |
|                          | 16-POST-MC297 | 3.55E+05                  | 75       | nd       | nd        | 1.0                  | 26.1     | 1.7                                | 218     | 7.79 |
|                          | 17-POST-GC600 | 2.30E+05                  | 42       | 1.89     | nd        | 0.00                 | 25.20    | 1.99                               | nd      | 7.99 |
|                          | 18-POST-GC600 | 1.38E+05                  | 56       | 1.69     | nd        | 0.44                 | 27.35    | 1.61                               | 207     | 7.93 |
|                          | 19-POST-MC252 | 1.25E+05                  | 80       | 2.13     | nd        | 0.69                 | 26.95    | 1.54                               | 210     | 7.9  |
|                          | 20-POST-MC253 | 1.55E+05                  | 61       | 1.70     | nd        | 0.31                 | 24.05    | 1.55                               | 240     | 7.95 |

**Supplementary Table S2: Statistics for high-quality pyrosequencing reads of the V3V5 and V6V4 regions of the 16S rRNA gene.**

| Sample ID     | Total reads |        | Reads assigned to Bacteria |        |
|---------------|-------------|--------|----------------------------|--------|
|               | V3V5        | V6V4   | V3V5                       | V6V4   |
| 1-PRE-MC118   | 54          | 26,632 | 54                         | 23,473 |
| 2-PRE-MC118   | 18575       | 24,952 | 18,457                     | 21,701 |
| 3-DUR-MC250   | 19,492      | 26,631 | 19,429                     | 22,831 |
| 4-DUR-MC250   | 23,170      | 34,515 | 23,164                     | 33,699 |
| 5-DUR-MC250   | 24,295      | 37,202 | 24,257                     | 34,905 |
| 6-DUR-MC335   | NA          | 9,081  | NA                         | 8,217  |
| 7-DUR-MC295   | 47,527      | 56,107 | 47,502                     | 55,094 |
| 8-DUR-MC295   | 50,560      | 37,893 | 50,550                     | 37,348 |
| 9-DUR-MC252   | 35,002      | 36,805 | 34,990                     | 36,253 |
| 10-DUR-MC252  | 13,521      | 33,529 | 13,465                     | 29,236 |
| 11-DUR-MC252  | 32,422      | 29,902 | 32,351                     | 26,953 |
| 12-DUR-MC252  | 50,713      | 47,456 | 50,609                     | 44,754 |
| 13-DUR-MC205  | 37,860      | 36,949 | 37,624                     | 34,838 |
| 14-POST-MC422 | 23,978      | 39,248 | 23,901                     | 37,265 |
| 15-POST-MC298 | NA          | 33,641 | NA                         | 29,530 |
| 16-POST-MC297 | NA          | 36,972 | NA                         | 32,386 |
| 17-POST-GC600 | NA          | 106    | NA                         | 84     |
| 18-POST-GC600 | 17,958      | 52,604 | 17,907                     | 51,024 |
| 19-POST-MC252 | 22,977      | 32,873 | 22,913                     | 29,666 |
| 20-POST-MC253 | 28,602      | 35,226 | 28,474                     | 30,700 |

Supplementary Table S3: Comparison of bacterial community composition\* based on relative read abundance (%) and OTU numbers (97% similarity threshold) of the V3V5 or V6V4 regions of 16S rRNA genes

| Taxonomic identification   | 1-PRE-MC118 |          |           |          | 2-PRE-MC118 |          |           |          | 3-DUR-MC250 |          |           |          | 4-DUR-MC250 |          |           |          | 5-DUR-MC250 |          |           |          |
|----------------------------|-------------|----------|-----------|----------|-------------|----------|-----------|----------|-------------|----------|-----------|----------|-------------|----------|-----------|----------|-------------|----------|-----------|----------|
|                            | V3V5        |          | V6V4      |          | V3V5        |          | V6V4      |          | V3V5        |          | V6V4      |          | V3V5        |          | V6V4      |          | V3V5        |          | V6V4      |          |
|                            | Reads (%)   | OTUs (#) | Reads (%) | OTUs (#) | Reads (%)   | OTUs (#) | Reads (%) | OTUs (#) | Reads (%)   | OTUs (#) | Reads (%) | OTUs (#) | Reads (%)   | OTUs (#) | Reads (%) | OTUs (#) | Reads (%)   | OTUs (#) | Reads (%) | OTUs (#) |
| <b>Total numbers</b>       | 100         | 38       | 100       | 811      | 100         | 1106     | 100       | 980      | 100         | 644      | 100       | 808      | 100         | 257      | 100       | 749      | 100         | 863      | 100       | 1428     |
| <b>Acidobacteria</b>       |             |          |           |          |             |          |           |          |             |          |           |          |             |          |           |          |             |          |           |          |
| Gp26                       | 3.7         | 2        | 0.2       | 2        | 0.1         | 3        | 0.3       | 1        | 0.1         | 1        | 0.2       | 1        | <0.1        | 1        | <0.1      | 3        | 0.2         | 1        | 0.1       | 7        |
| Acidobacteria_others       | 1.9         | 1        | 0.8       | 17       | 1.4         | 42       | 1.3       | 22       | 1.8         | 25       | 1.6       | 27       | 0.1         | 7        | 0.1       | 18       | 1.1         | 42       | 0.4       | 46       |
| <b>Actinobacteria</b>      | 0           | 0        | 4.6       | 19       | 2.6         | 11       | 5.0       | 25       | 2.9         | 10       | 3.9       | 29       | 0.1         | 5        | 0.1       | 10       | 0.8         | 12       | 0.4       | 23       |
| <b>Bacteroidetes</b>       |             |          |           |          |             |          |           |          |             |          |           |          |             |          |           |          |             |          |           |          |
| Bacteroidia                | 0           | 0        | 0.1       | 8        | 1.0         | 6        | 0.6       | 9        | <0.1        | 1        | 0         | 0        | <0.1        | 1        | <0.1      | 2        | <0.1        | 2        | <0.1      | 1        |
| Flavobacteria              | 11.1        | 6        | 3.0       | 53       | 4.6         | 80       | 2.4       | 57       | 2.0         | 31       | 2.6       | 58       | 0.4         | 19       | 0.3       | 43       | 3.5         | 48       | 1.3       | 73       |
| Sphingobacteria            | 0           | 0        | 0.9       | 11       | 1.3         | 30       | 1.0       | 18       | 0.7         | 16       | 1.3       | 33       | 0           | 3        | 0         | 6        | 0.2         | 14       | 0.2       | 20       |
| Bacteroidetes_others       | 0           | 0        | 0         | 0        | 0           | 0        | 0         | 0        | <0.1        | 0        | <0.1      | 1        | 0           | 0        | 0         | 0        | <0.1        | 0        | 0         | 0        |
| <b>Chloroflexi</b>         |             |          |           |          |             |          |           |          |             |          |           |          |             |          |           |          |             |          |           |          |
| SAR202                     | 3.7         | 2        | 4.7       | 60       | 5.9         | 103      | 4.1       | 60       | 5.0         | 49       | 2.6       | 43       | <0.1        | 3        | 0.1       | 11       | 0.8         | 45       | 0.3       | 42       |
| Chloroflexi_others         | 0           | 0        | 0.2       | 7        | 0.1         | 4        | 0.2       | 13       | 0.2         | 8        | 0.2       | 9        | 0.0         | 0        | <0.1      | 3        | <0.1        | 8        | <0.1      | 4        |
| <b>Cyanobacteria</b>       | 0           | 0        | <0.1      | 2        | 0.5         | 35       | 0         | 9        | 0           | 16       | 2         | 29       | <0.1        | 2        | <0.1      | 2        | 0.2         | 12       | 0.1       | 11       |
| <b>Deferribacteres</b>     | 14.8        | 6        | 15.6      | 88       | 18.0        | 113      | 17.1      | 111      | 17.1        | 90       | 13.7      | 72       | 0.5         | 34       | 0.4       | 58       | 3.3         | 77       | 1.4       | 109      |
| <b>Firmicutes</b>          |             |          |           |          |             |          |           |          |             |          |           |          |             |          |           |          |             |          |           |          |
| Bacilli                    | 0           | 0        | 0.9       | 11       | 0.4         | 11       | 0.4       | 7        | 0.1         | 3        | 0.1       | 4        | 0           | 0        | 0         | 0        | <0.1        | 4        | <0.1      | 1        |
| Clostridia                 | 0           | 0        | 0.3       | 6        | 0.4         | 14       | 0.5       | 16       | 0           | 0        | 0.1       | 1        | 0           | 0        | <0.1      | 4        | <0.1        | 3        | <0.1      | 3        |
| Erysipelotrichi            | 0           | 0        | 0         | 0        | 0           | 0        | 0         | 0        | 0           | 1        | 0         | 0        | 0           | 0        | 0         | 0        | 0           | 0        | 0         | 0        |
| Firmicutes_others          | 0           | 0        | <0.1      | 1        | 0.5         | 2        | 0.2       | 1        | 0           | 0        | 0         | 0        | 0           | 0        | 0         | 0        | 0           | 0        | 0         | 0        |
| <b>Gemmatimonadetes</b>    | 1.9         | 1        | 1.1       | 8        | 1.6         | 18       | 1.5       | 10       | 1.6         | 10       | 1.8       | 10       | 0.1         | 9        | 0.1       | 11       | 0.9         | 13       | 0.3       | 17       |
| <b>Planctomycetes</b>      |             |          |           |          |             |          |           |          |             |          |           |          |             |          |           |          |             |          |           |          |
| Phycisphaerae              | 1.9         | 1        | 0.3       | 4        | 1.0         | 22       | 1.0       | 19       | 1.8         | 17       | 0.6       | 8        | 0.2         | 11       | 0.1       | 12       | 1.6         | 21       | 0.3       | 28       |
| Planctomycetacia           | 0           | 0        | 1.4       | 30       | 2.3         | 63       | 1.5       | 43       | 3.7         | 46       | 1.6       | 30       | 0.1         | 18       | 0.1       | 28       | 2.7         | 81       | 0.5       | 85       |
| Planctomycetes_others      | 0           | 0        | 0.1       | 2        | 0           | 0        | <0.1      | 1        | <0.1        | 1        | 0.1       | 2        | 0           | 0        | <0.1      | 1        | <0.1        | 4        | 0         | 0        |
| <b>Proteobacteria</b>      |             |          |           |          |             |          |           |          |             |          |           |          |             |          |           |          |             |          |           |          |
| Alphaproteobacteria        |             |          |           |          |             |          |           |          |             |          |           |          |             |          |           |          |             |          |           |          |
| SAR11                      | 3.7         | 2        | 13.0      | 80       | 10.7        | 45       | 15.2      | 93       | 16.2        | 36       | 20.8      | 85       | 0.6         | 9        | 0.8       | 57       | 2.1         | 22       | 2.8       | 90       |
| Alphaproteobacteria_others | 11.1        | 5        | 6.0       | 94       | 5.2         | 109      | 6.3       | 114      | 3.5         | 54       | 5.7       | 86       | 0.2         | 18       | 0.3       | 45       | 2.7         | 91       | 1.3       | 120      |
| Betaproteobacteria         | 0           | 0        | 0.4       | 8        | <0.1        | 3        | 0.2       | 4        | 1.7         | 9        | 2.0       | 14       | 0.2         | 6        | 0.1       | 13       | 0.3         | 9        | 0.1       | 11       |
| Deltaproteobacteria        | 31.5        | 7        | 14.1      | 88       | 24.0        | 164      | 14.1      | 119      | 14.6        | 82       | 12.0      | 64       | 0.6         | 21       | 0.5       | 49       | 3.3         | 105      | 1.3       | 105      |
| Epsilonproteobacteria      | 0           | 0        | 0.5       | 7        | 0.4         | 8        | 0.2       | 6        | <0.1        | 1        | <0.1      | 2        | 0.1         | 5        | <0.1      | 9        | 4.9         | 5        | 1.2       | 20       |
| Gammaproteobacteria        |             |          |           |          |             |          |           |          |             |          |           |          |             |          |           |          |             |          |           |          |
| Colwellia                  | 0           | 0        | 0.4       | 6        | 0.0         | 1        | 0.7       | 9        | 0.4         | 5        | 1.5       | 15       | 8.7         | 9        | 16.6      | 82       | 13.1        | 14       | 27.7      | 125      |
| Oceaniserpentilla          | 1.9         | 1        | 2.3       | 3        | 0.6         | 4        | 1.7       | 3        | 2.6         | 4        | 4.7       | 4        | 74.3        | 9        | 65.9      | 83       | 5.8         | 3        | 6.8       | 43       |
| Cycloclasticus             | 0           | 0        | 0.1       | 1        | 0.6         | 5        | 1.5       | 2        | 1.0         | 5        | 3.1       | 6        | 12.6        | 8        | 13.2      | 50       | 42.1        | 13       | 46.8      | 138      |
| Gammaproteobacteria_others | 13.0        | 4        | 25.8      | 146      | 14.5        | 143      | 19.4      | 148      | 15.4        | 82       | 15.0      | 123      | 0.8         | 37       | 1.0       | 112      | 7.0         | 120      | 6.0       | 230      |
| Proteobacteria_others      | 0           | 0        | <0.1      | 1        | 0           | 0        | 0         | 0        | 0           | 0        | <0.1      | 1        | 0           | 0        | 0         | 1        | 0           | 0        | <0.1      | 1        |
| <b>Verrucomicrobia</b>     |             |          |           |          |             |          |           |          |             |          |           |          |             |          |           |          |             |          |           |          |
| Verrucomicrobiae           | 0           | 0        | 0.3       | 6        | 0.4         | 6        | 0.3       | 14       | 1.5         | 9        | 0.5       | 6        | <0.1        | 5        | <0.1      | 8        | 0.6         | 19       | 0.1       | 14       |
| Verrucomicrobia_others     | 0           | 0        | 2.1       | 16       | 1.1         | 17       | 2.2       | 18       | 4.7         | 11       | 1.7       | 15       | 0.2         | 7        | 0.1       | 8        | 2.0         | 20       | 0.4       | 25       |
| <b>Bacteria_others</b>     | 0           | 0        | 0.8       | 26       | 0.6         | 44       | 0.6       | 28       | 0.7         | 21       | 0.8       | 30       | 0.1         | 10       | 0.1       | 20       | 0.5         | 55       | 0.2       | 36       |

(table continued on next page)

Supplementary Table S3 (continued): Comparison of bacterial community composition based on relative read abundance (%) and OTU numbers (97% similarity threshold) of the V3V5 or V6V4 regions of 16S rRNA genes

| Taxonomic identification   | 6-DUR-MC335 |          |           |          | 7-DUR-MC295 |          |           |          | 8-DUR-MC295 |          |           |          | 9-DUR-MC252 |          |           |          | 10-DUR-MC252 |          |           |          |
|----------------------------|-------------|----------|-----------|----------|-------------|----------|-----------|----------|-------------|----------|-----------|----------|-------------|----------|-----------|----------|--------------|----------|-----------|----------|
|                            | V3V5        |          | V6V4      |          | V3V5        |          | V6V4      |          | V3V5        |          | V6V4      |          | V3V5        |          | V6V4      |          | V3V5         |          | V6V4      |          |
|                            | Reads (%)   | OTUs (#) | Reads (%) | OTUs (#) | Reads (%)   | OTUs (#) | Reads (%) | OTUs (#) | Reads (%)   | OTUs (#) | Reads (%) | OTUs (#) | Reads (%)   | OTUs (#) | Reads (%) | OTUs (#) | Reads (%)    | OTUs (#) | Reads (%) | OTUs (#) |
| <b>Total numbers</b>       | 0           | 0        | 100       | 199      | 100         | 287      | 100       | 347      | 100         | 377      | 100       | 329      | 100         | 338      | 100       | 548      | 100          | 693      | 100       | 1090     |
| <b>Acidobacteria</b>       |             |          |           |          |             |          |           |          |             |          |           |          |             |          |           |          |              |          |           |          |
| Gp26                       | -           | -        | <0.1      | 1        | <0.1        | 3        | <0.1      | 1        | <0.1        | 2        | 0.1       | 1        | <0.1        | 1        | <0.1      | 2        | 0.2          | 1        | 0.1       | 1        |
| Acidobacteria_others       | -           | -        | 0.1       | 5        | 0.1         | 18       | 0.1       | 12       | 0.3         | 23       | 0.1       | 16       | 0.1         | 15       | 0.1       | 12       | 2.2          | 30       | 1.0       | 28       |
| <b>Actinobacteria</b>      | -           | -        | 0.2       | 6        | 0.1         | 9        | 0.1       | 10       | 0.1         | 10       | 0.1       | 7        | 0.0         | 7        | 0.1       | 12       | 1.3          | 11       | 1.2       | 31       |
| <b>Bacteroidetes</b>       |             |          |           |          |             |          |           |          |             |          |           |          |             |          |           |          |              |          |           |          |
| Bacteroidia                | -           | -        | 0         | 0        | <0.1        | 4        | <0.1      | 1        | <0.1        | 2        | 0         | 0        | 0           | 0        | 0         | 0        | 0.1          | 4        | <0.1      | 2        |
| Flavobacteria              | -           | -        | 2.7       | 19       | 0.3         | 19       | 0.3       | 29       | 0.6         | 23       | 0.3       | 22       | 0.3         | 27       | 0.1       | 23       | 5.4          | 36       | 3.3       | 59       |
| Sphingobacteria            | -           | -        | 0.2       | 5        | 0.1         | 5        | 0         | 6        | 0.1         | 4        | 0.1       | 4        | 0.1         | 6        | 0         | 6        | 0.3          | 12       | 0.8       | 39       |
| Bacteroidetes_others       | -           | -        | 0         | 0        | 0           | 0        | 0         | 0        | 0           | 0        | 0         | 0        | 0           | 0        | 0         | 0        | <0.1         | 0        | <0.1      | 0        |
| <b>Chloroflexi</b>         |             |          |           |          |             |          |           |          |             |          |           |          |             |          |           |          |              |          |           |          |
| SAR202                     | -           | -        | 0         | 0        | 0           | 0        | <0.1      | 4        | <0.1        | 6        | <0.1      | 5        | 0.1         | 12       | <0.1      | 8        | 5.0          | 52       | 2.7       | 64       |
| Chloroflexi_others         | -           | -        | 0         | 0        | 0           | 0        | 0         | 0        | <0.1        | 1        | <0.1      | 3        | 0           | 0        | 0         | 0        | 0.1          | 7        | 0.1       | 13       |
| <b>Cyanobacteria</b>       | -           | -        | <0.1      | 2        | <0.1        | 2        | <0.1      | 2        | 0.1         | 5        | <0.1      | 5        | <0.1        | 6        | <0.1      | 3        | 0            | 13       | 0         | 27       |
| <b>Deferribacteres</b>     | -           | -        | 0.3       | 5        | 0.2         | 16       | 0.1       | 12       | 0.3         | 28       | 0.2       | 20       | 0.3         | 29       | 0.2       | 37       | 13.3         | 84       | 12.1      | 96       |
| <b>Firmicutes</b>          |             |          |           |          |             |          |           |          |             |          |           |          |             |          |           |          |              |          |           |          |
| Bacilli                    | -           | -        | 0.2       | 3        | <0.1        | 2        | 0         | 0        | <0.1        | 1        | <0.1      | 1        | 0.0         | 0        | <0.1      | 1        | 0.2          | 3        | <0.1      | 2        |
| Clostridia                 | -           | -        | 0.1       | 4        | 0           | 0        | 0         | 0        | 0           | 0        | 0         | 0        | <0.1        | 1        | <0.1      | 2        | <0.1         | 0        | 0.2       | 8        |
| Erysipelotrichi            | -           | -        | 0         | 0        | 0           | 0        | 0         | 0        | 0           | 0        | 0         | 0        | 0           | 0        | 0         | 0        | 0            | 0        | 0         | 0        |
| Firmicutes_others          | -           | -        | 0         | 0        | 0           | 0        | 0         | 0        | 0           | 0        | 0         | 0        | 0           | 0        | 0         | 0        | 0            | 0        | 0         | 0        |
| <b>Gemmatimonadetes</b>    | -           | -        | <0.1      | 1        | 0.3         | 10       | 0.1       | 8        | 0.3         | 13       | 0.1       | 7        | 0.1         | 10       | 0.1       | 8        | 1.9          | 13       | 1.3       | 9        |
| <b>Planctomycetes</b>      |             |          |           |          |             |          |           |          |             |          |           |          |             |          |           |          |              |          |           |          |
| Phycisphaerae              | -           | -        | 0.1       | 4        | 0.2         | 8        | <0.1      | 5        | 0.2         | 12       | 0.1       | 5        | 0.2         | 11       | 0.1       | 11       | 2.5          | 15       | 1.1       | 12       |
| Planctomycetacia           | -           | -        | 0.3       | 10       | 0.3         | 24       | 0.1       | 16       | 0.4         | 41       | 0.1       | 21       | 0.1         | 28       | 0.1       | 16       | 4.2          | 47       | 1.7       | 54       |
| Planctomycetes_others      | -           | -        | 0         | 0        | 0           | 0        | 0         | 0        | 0           | 0        | 0         | 0        | <0.1        | 1        | <0.1      | 1        | <0.1         | 2        | 0         | 1        |
| <b>Proteobacteria</b>      |             |          |           |          |             |          |           |          |             |          |           |          |             |          |           |          |              |          |           |          |
| Alphaproteobacteria        |             |          |           |          |             |          |           |          |             |          |           |          |             |          |           |          |              |          |           |          |
| SAR11                      | -           | -        | 3.8       | 22       | 0.5         | 16       | 0.6       | 36       | 1.0         | 24       | 0.8       | 37       | 0.5         | 16       | 0.7       | 45       | 7.6          | 29       | 17.1      | 101      |
| Alphaproteobacteria_others | -           | -        | 1.0       | 15       | 0.1         | 19       | 0.2       | 36       | 0.3         | 33       | 0.3       | 43       | 0.2         | 28       | 0.2       | 38       | 4.5          | 63       | 6.5       | 123      |
| Betaproteobacteria         | -           | -        | 0.5       | 3        | 0.3         | 11       | 0.5       | 10       | 0.3         | 12       | 0.3       | 10       | <0.1        | 5        | <0.1      | 6        | 0.7          | 6        | 1.1       | 17       |
| Deltaproteobacteria        | -           | -        | 0.2       | 7        | 0.6         | 20       | 0.4       | 20       | 1.4         | 36       | 0.6       | 13       | 0.4         | 35       | 0.2       | 36       | 15.7         | 87       | 11.5      | 113      |
| Epsilonproteobacteria      | -           | -        | 0.4       | 6        | 0.1         | 5        | <0.1      | 6        | <0.1        | 1        | <0.1      | 2        | <0.1        | 2        | <0.1      | 2        | 0.1          | 5        | <0.1      | 4        |
| Gammaproteobacteria        |             |          |           |          |             |          |           |          |             |          |           |          |             |          |           |          |              |          |           |          |
| Colwellia                  | -           | -        | 35.3      | 20       | 0.5         | 9        | 3.6       | 23       | 0.2         | 6        | 1.2       | 14       | 2.0         | 8        | 3.7       | 41       | 0.9          | 4        | 3.3       | 20       |
| Oceaniserpentilla          | -           | -        | 1.9       | 1        | 92.3        | 13       | 88.6      | 33       | 92.7        | 16       | 93.7      | 26       | 79.6        | 16       | 77.3      | 72       | 5.8          | 3        | 9.6       | 9        |
| Cycloclasticus             | -           | -        | 46.5      | 9        | 3.0         | 5        | 4.1       | 8        | 0.5         | 5        | 0.6       | 4        | 15.3        | 7        | 16.3      | 47       | 1.4          | 6        | 3.3       | 6        |
| Gammaproteobacteria_others | -           | -        | 5.8       | 42       | 0.6         | 46       | 0.7       | 50       | 0.7         | 52       | 0.9       | 53       | 0.6         | 44       | 0.7       | 93       | 17.5         | 98       | 17.6      | 171      |
| Proteobacteria_others      | -           | -        | 0         | 0        | 0           | 0        | 0         | 0        | 0           | 0        | 0         | 0        | 0           | 0        | <0.1      | 0        | 0            | 0        | 0         | 0        |
| <b>Verrucomicrobia</b>     |             |          |           |          |             |          |           |          |             |          |           |          |             |          |           |          |              |          |           |          |
| Verrucomicrobiae           | -           | -        | 0.1       | 1        | 0.1         | 5        | <0.1      | 5        | <0.1        | 4        | 0.1       | 2        | <0.1        | 6        | <0.1      | 7        | 1.5          | 11       | 0.5       | 14       |
| Verrucomicrobia_others     | -           | -        | <0.1      | 1        | 0.1         | 4        | 0.0       | 4        | 0.2         | 2        | 0.1       | 4        | 0.1         | 5        | 0.1       | 9        | 6.1          | 17       | 2.2       | 19       |
| <b>Bacteria_others</b>     | -           | -        | 0.2       | 7        | 0.1         | 14       | 0.1       | 10       | 0.1         | 15       | <0.1      | 4        | 0.1         | 12       | <0.1      | 10       | 1.1          | 34       | 0.9       | 47       |

(table continued on next page)

Supplementary Table S3 (continued): Comparison of bacterial community composition based on relative read abundance (%) and OTU numbers (97% similarity threshold) of the V3V5 or V6V4 regions of 16S rRNA genes

| Taxonomic identification   | 11-DUR-MC252 |          |           |          | 12-DUR-MC252 |          |           |          | 13-DUR-MC205 |          |           |          | 14-POST-MC422 |          |           |          | 15-POST-MC298 |          |           |          |
|----------------------------|--------------|----------|-----------|----------|--------------|----------|-----------|----------|--------------|----------|-----------|----------|---------------|----------|-----------|----------|---------------|----------|-----------|----------|
|                            | V3V5         |          | V6V4      |          | V3V5         |          | V6V4      |          | V3V5         |          | V6V4      |          | V3V5          |          | V6V4      |          | V3V5          |          | V6V4      |          |
|                            | Reads (%)    | OTUs (#) | Reads (%) | OTUs (#) | Reads (%)    | OTUs (#) | Reads (%) | OTUs (#) | Reads (%)    | OTUs (#) | Reads (%) | OTUs (#) | Reads (%)     | OTUs (#) | Reads (%) | OTUs (#) | Reads (%)     | OTUs (#) | Reads (%) | OTUs (#) |
| <b>Total numbers</b>       | 100          | 911      | 100       | 986      | 100          | 1273     | 100       | 1405     | 100          | 1283     | 100       | 1391     | 100           | 635      | 100       | 973      | 0             | 0        | 100       | 777      |
| <b>Acidobacteria</b>       |              |          |           |          |              |          |           |          |              |          |           |          |               |          |           |          |               |          |           |          |
| Gp26                       | 0.1          | 3        | 0.2       | 1        | <0.1         | 4        | 0.1       | 1        | 0.2          | 3        | 0.2       | 3        | <0.1          | 1        | <0.1      | 1        | -             | -        | 0.1       | 1        |
| Acidobacteria_others       | 0.7          | 21       | 0.5       | 21       | 0.5          | 29       | 0.4       | 26       | 1.2          | 44       | 0.9       | 31       | 0.3           | 21       | 0.1       | 19       | -             | -        | 0.4       | 19       |
| <b>Actinobacteria</b>      | 2.5          | 19       | 4.3       | 31       | 0.9          | 15       | 1.3       | 27       | 2.1          | 16       | 2.8       | 22       | 0.9           | 12       | 0.7       | 17       | -             | -        | 1.2       | 20       |
| <b>Bacteroidetes</b>       |              |          |           |          |              |          |           |          |              |          |           |          |               |          |           |          |               |          |           |          |
| Bacteroidia                | 0.1          | 5        | <0.1      | 9        | 26.4         | 28       | 12.1      | 41       | <0.1         | 4        | <0.1      | 0        | <0.1          | 1        | <0.1      | 2        | -             | -        | <0.1      | 1        |
| Flavobacteria              | 1.7          | 41       | 2.1       | 68       | 1.8          | 59       | 1.3       | 62       | 3.0          | 79       | 2.3       | 82       | 53.9          | 58       | 22.7      | 74       | -             | -        | 3.5       | 53       |
| Sphingobacteria            | 0.6          | 15       | 0.6       | 17       | 0.5          | 26       | 0.4       | 25       | 0.5          | 22       | 0.5       | 28       | 0.7           | 13       | 0.3       | 16       | -             | -        | 0.5       | 9        |
| Bacteroidetes_others       | 0            | 0        | 0         | 0        | <0.1         | 0        | <0.1      | 0        | <0.1         | 0        | <0.1      | 0        | 0             | 0        | 0.0       | 0        | -             | -        | 0         | 0        |
| <b>Chloroflexi</b>         |              |          |           |          |              |          |           |          |              |          |           |          |               |          |           |          |               |          |           |          |
| SAR202                     | 4.4          | 90       | 2.1       | 62       | 2.0          | 99       | 1.3       | 58       | 3.9          | 112      | 2.7       | 90       | 0.8           | 21       | 0.4       | 28       | -             | -        | 1.2       | 38       |
| Chloroflexi_others         | 0.1          | 8        | 0.1       | 8        | 0.1          | 16       | 0.1       | 13       | 0.1          | 10       | 0.1       | 12       | <0.1          | 2        | <0.1      | 8        | -             | -        | 0.2       | 5        |
| <b>Cyanobacteria</b>       | 0            | 17       | 0         | 14       | 0            | 31       | 0.1       | 20       | 0            | 25       | 0         | 26       | 0.9           | 11       | 0.5       | 9        | -             | -        | 0.2       | 11       |
| <b>Deferribacteres</b>     | 18.3         | 119      | 14.3      | 110      | 7.3          | 113      | 7.0       | 115      | 15.0         | 121      | 11.7      | 136      | 4.3           | 58       | 3.1       | 85       | -             | -        | 14.2      | 99       |
| <b>Firmicutes</b>          |              |          |           |          |              |          |           |          |              |          |           |          |               |          |           |          |               |          |           |          |
| Bacilli                    | 0.6          | 6        | 0.5       | 16       | 0.1          | 7        | 0.1       | 7        | 0.1          | 7        | <0.1      | 2        | 0.1           | 4        | <0.1      | 5        | -             | -        | 0.2       | 5        |
| Clostridia                 | 0.2          | 11       | 0.3       | 21       | 18.6         | 96       | 12.6      | 132      | <0.1         | 3        | 0.1       | 6        | <0.1          | 1        | <0.1      | 3        | -             | -        | 0.1       | 3        |
| Erysipelotrichi            | 0            | 0        | 0         | 0        | 2.0          | 10       | 1.4       | 11       | <0.1         | 1        | 0         | 0        | 0             | 0        | 0.0       | 0        | -             | -        | <0.1      | 2        |
| Firmicutes_others          | 0            | 0        | 0         | 0        | 0            | 0        | 0         | 0        | 0            | 0        | 0         | 0        | <0.1          | 1        | <0.1      | 1        | -             | -        | 0         | 0        |
| <b>Gemmatimonadetes</b>    | 1.0          | 12       | 0.6       | 8        | 0.7          | 10       | 0.5       | 9        | 1.6          | 18       | 0.9       | 17       | 0.6           | 7        | 0.2       | 8        | -             | -        | 0.2       | 5        |
| <b>Planctomycetes</b>      |              |          |           |          |              |          |           |          |              |          |           |          |               |          |           |          |               |          |           |          |
| Phycisphaerae              | 0.8          | 18       | 0.3       | 9        | 1.0          | 27       | 0.4       | 18       | 1.4          | 24       | 0.8       | 22       | 0.9           | 16       | 0.3       | 19       | -             | -        | 0.4       | 11       |
| Planctomycetacia           | 1.9          | 37       | 0.9       | 37       | 1.7          | 75       | 0.6       | 52       | 2.1          | 87       | 1.4       | 68       | 2.0           | 54       | 0.7       | 50       | -             | -        | 1.1       | 33       |
| Planctomycetes_others      | <0.1         | 3        | <0.1      | 1        | <0.1         | 3        | <0.1      | 1        | <0.1         | 2        | <0.1      | 1        | <0.1          | 2        | <0.1      | 1        | -             | -        | 0         | 0        |
| <b>Proteobacteria</b>      |              |          |           |          |              |          |           |          |              |          |           |          |               |          |           |          |               |          |           |          |
| Alphaproteobacteria        |              |          |           |          |              |          |           |          |              |          |           |          |               |          |           |          |               |          |           |          |
| SAR11                      | 16.2         | 53       | 14.5      | 97       | 2.9          | 32       | 5.7       | 90       | 13.0         | 60       | 12.4      | 97       | 4.6           | 24       | 7.4       | 95       | -             | -        | 41.5      | 98       |
| Alphaproteobacteria_others | 3.0          | 85       | 5.3       | 124      | 2.5          | 128      | 3.5       | 164      | 3.5          | 121      | 5.4       | 162      | 3.3           | 84       | 3.1       | 134      | -             | -        | 7.3       | 111      |
| Betaproteobacteria         | 0.8          | 23       | 1.0       | 18       | 0.5          | 27       | 0.8       | 17       | 0.5          | 21       | 0.9       | 13       | 0.1           | 6        | 2.0       | 9        | -             | -        | 0.4       | 9        |
| Deltaproteobacteria        | 14.1         | 157      | 8.7       | 106      | 7.4          | 177      | 5.2       | 151      | 13.9         | 201      | 10.4      | 181      | 3.3           | 61       | 1.5       | 69       | -             | -        | 7.6       | 87       |
| Epsilonproteobacteria      | 0.0          | 0        | 0.1       | 4        | 0.1          | 5        | <0.1      | 10       | 0.1          | 4        | <0.1      | 2        | 0.1           | 2        | 0.1       | 4        | -             | -        | 0.1       | 6        |
| Gammaproteobacteria        |              |          |           |          |              |          |           |          |              |          |           |          |               |          |           |          |               |          |           |          |
| Colwellia                  | 0.2          | 8        | 2.5       | 15       | 0.1          | 7        | 2.0       | 27       | 0.3          | 7        | 2.6       | 24       | <0.1          | 1        | 0.3       | 19       | -             | -        | <0.1      | 1        |
| Oceaniserpentilla          | 13.1         | 3        | 26.1      | 9        | 11.7         | 7        | 31.4      | 40       | 12.3         | 6        | 17.5      | 21       | <0.1          | 4        | 0.1       | 2        | -             | -        | 0         | 0        |
| Cycloclasticus             | 1.1          | 5        | 2.7       | 5        | 0.5          | 6        | 1.9       | 13       | 6.9          | 11       | 10.3      | 22       | 2.8           | 6        | 3.4       | 7        | -             | -        | 0.1       | 1        |
| Gammaproteobacteria_others | 13.9         | 91       | 10.2      | 121      | 6.3          | 143      | 8.0       | 196      | 14.0         | 173      | 12.9      | 218      | 19.8          | 117      | 52.1      | 220      | -             | -        | 17.4      | 112      |
| Proteobacteria_others      | 0            | 0        | 0         | 1        | <0.1         | 0        | 0         | 0        | <0.1         | 0        | 0         | 0        | 0             | 0        | 0         | 0        | -             | -        | 0         | 0        |
| <b>Verrucomicrobia</b>     |              |          |           |          |              |          |           |          |              |          |           |          |               |          |           |          |               |          |           |          |
| Verrucomicrobiae           | 0.9          | 9        | 0.2       | 10       | 1.8          | 18       | 0.4       | 10       | 0.6          | 17       | 0.3       | 17       | 0.1           | 8        | 0.1       | 8        | -             | -        | 0.2       | 3        |
| Verrucomicrobia_others     | 3.1          | 21       | 1.4       | 16       | 2.2          | 31       | 1.1       | 21       | 3.0          | 31       | 1.9       | 24       | 0.3           | 15       | 0.6       | 19       | -             | -        | 1.4       | 17       |
| <b>Bacteria_others</b>     | 0.4          | 31       | 0.4       | 27       | 0.4          | 44       | 0.3       | 48       | 0.5          | 53       | 0.7       | 64       | 0.2           | 24       | 0.2       | 41       | -             | -        | 0.4       | 17       |

(table continued on next page)

Supplementary Table S3 (continued): Comparison of bacterial community composition based on relative read abundance (%) and OTU numbers (97% similarity threshold) of the V3V5 or V6V4 regions of 16S rRNA genes

| Taxonomic identification           | 16-POST-MC297 |          |           |          | 17-POST-GC600 |          |           |          | 18-POST-GC600 |          |           |          | 19-POST-MC252 |          |           |          | 20-POST-MC253 |          |           |          |
|------------------------------------|---------------|----------|-----------|----------|---------------|----------|-----------|----------|---------------|----------|-----------|----------|---------------|----------|-----------|----------|---------------|----------|-----------|----------|
|                                    | V3V5          |          | V6V4      |          | V3V5          |          | V6V4      |          | V3V5          |          | V6V4      |          | V3V5          |          | V6V4      |          | V3V5          |          | V6V4      |          |
|                                    | Reads (%)     | OTUs (#) | Reads (%) | OTUs (#) | Reads (%)     | OTUs (#) | Reads (%) | OTUs (#) | Reads (%)     | OTUs (#) | Reads (%) | OTUs (#) | Reads (%)     | OTUs (#) | Reads (%) | OTUs (#) | Reads (%)     | OTUs (#) | Reads (%) | OTUs (#) |
| <b>Total numbers</b>               | 0             | 0        | 100       | 917      | 0             | 0        | 100       | 42       | 100           | 1287     | 100       | 1640     | 100           | 1899     | 100       | 2997     | 100           | 4644     | 100       | 6835     |
| <b><i>Acidobacteria</i></b>        |               |          |           |          |               |          |           |          |               |          |           |          |               |          |           |          |               |          |           |          |
| Gp26                               | -             | -        | 0.2       | 1        | -             | -        | 0         | 0        | 0.1           | 3        | 0.1       | 1        | 0.1           | 2        | 0.2       | 4        | 0.2           | 8        | 0.3       | 15       |
| <i>Acidobacteria</i> _others       | -             | -        | 1.6       | 29       | -             | -        | 0.0       | 0        | 1.4           | 50       | 0.5       | 38       | 1.2           | 61       | 0.9       | 63       | 3.6           | 248      | 2.8       | 290      |
| <b><i>Actinobacteria</i></b>       | -             | -        | 2.4       | 17       | -             | -        | 4.9       | 2        | 1.2           | 16       | 1.1       | 26       | 0.5           | 14       | 0.6       | 28       | 1.3           | 49       | 1.8       | 108      |
| <b><i>Bacteroidetes</i></b>        |               |          |           |          |               |          |           |          |               |          |           |          |               |          |           |          |               |          |           |          |
| <i>Bacteroidia</i>                 | -             | -        | 0         | 0        | -             | -        | 0         | 0        | < 0.1         | 6        | < 0.1     | 2        | 0.2           | 24       | 0.2       | 22       | < 0.1         | 3        | < 0.1     | 12       |
| <i>Flavobacteria</i>               | -             | -        | 2.5       | 44       | -             | -        | 1.2       | 2        | 4.7           | 61       | 1.8       | 91       | 2.9           | 102      | 2.3       | 127      | 2.8           | 139      | 2.5       | 172      |
| <i>Sphingobacteria</i>             | -             | -        | 0.5       | 16       | -             | -        | 1.2       | 1        | 0.9           | 37       | 0.3       | 40       | 1.5           | 87       | 1.4       | 92       | 2.4           | 186      | 2.1       | 243      |
| <i>Bacteroidetes</i> _others       | -             | -        | 0         | 0        | -             | -        | 0         | 0        | < 0.1         | 0        | < 0.1     | 3        | 0.5           | 0        | 0.3       | 9        | < 0.1         | 0        | < 0.1     | 2        |
| <b><i>Chloroflexi</i></b>          |               |          |           |          |               |          |           |          |               |          |           |          |               |          |           |          |               |          |           |          |
| SAR202                             | -             | -        | 2.9       | 54       | -             | -        | 0         | 0        | 3.6           | 80       | 1.5       | 78       | 4.6           | 138      | 3.0       | 138      | 5.2           | 165      | 3.8       | 218      |
| <i>Chloroflexi</i> _others         | -             | -        | 0.1       | 11       | -             | -        | 0         | 0        | 0.4           | 40       | 0.2       | 50       | 0.2           | 24       | 0.2       | 35       | 0.8           | 108      | 1.1       | 153      |
| <b><i>Cyanobacteria</i></b>        | -             | -        | 1         | 11       | -             | -        | 1         | 1        | 0             | 24       | 0         | 28       | 0             | 48       | 0         | 36       | 0             | 68       | 0         | 46       |
| <b><i>Deferribacteres</i></b>      | -             | -        | 14.8      | 105      | -             | -        | 3.7       | 3        | 12.5          | 96       | 5.9       | 118      | 8.5           | 115      | 10.6      | 262      | 10.7          | 151      | 9.1       | 411      |
| <b><i>Firmicutes</i></b>           |               |          |           |          |               |          |           |          |               |          |           |          |               |          |           |          |               |          |           |          |
| <i>Bacilli</i>                     | -             | -        | 0.1       | 2        | -             | -        | 1.2       | 1        | 0.1           | 1        | < 0.1     | 7        | < 0.1         | 3        | < 0.1     | 3        | < 0.1         | 9        | < 0.1     | 6        |
| <i>Clostridia</i>                  | -             | -        | 0.1       | 3        | -             | -        | 0         | 0        | < 0.1         | 0        | 0.1       | 9        | 0.3           | 28       | 0.3       | 39       | 0.1           | 16       | 0.3       | 48       |
| <i>Erysipelotrichi</i>             | -             | -        | 0         | 0        | -             | -        | 0         | 0        | 0             | 0        | < 0.1     | 1        | < 0.1         | 4        | 0.1       | 6        | < 0.1         | 2        | < 0.1     | 1        |
| <i>Firmicutes</i> _others          | -             | -        | 0         | 0        | -             | -        | 0         | 0        | 0             | 0        | < 0.1     | 1        | 0.3           | 8        | 0.3       | 9        | < 0.1         | 3        | < 0.1     | 1        |
| <b><i>Gemmatimonadetes</i></b>     | -             | -        | 1.6       | 8        | -             | -        | 0         | 0        | 1.9           | 16       | 0.4       | 9        | 1.2           | 18       | 0.8       | 30       | 2.3           | 79       | 1.4       | 96       |
| <b><i>Planctomycetes</i></b>       |               |          |           |          |               |          |           |          |               |          |           |          |               |          |           |          |               |          |           |          |
| <i>Phycisphaerae</i>               | -             | -        | 0.8       | 17       | -             | -        | 0         | 0        | 1.3           | 26       | 0.3       | 28       | 0.7           | 28       | 0.7       | 51       | 2.2           | 184      | 2.4       | 297      |
| <i>Planctomycetacia</i>            | -             | -        | 2.8       | 60       | -             | -        | 0         | 0        | 3.5           | 120      | 1.2       | 81       | 1.0           | 73       | 1.6       | 123      | 5.9           | 524      | 4.7       | 530      |
| <i>Planctomycetes</i> _others      | -             | -        | 0.1       | 2        | -             | -        | 0         | 0        | 0.1           | 7        | 0         | 3        | < 0.1         | 1        | 0.1       | 10       | 0.3           | 24       | 0.7       | 54       |
| <b><i>Proteobacteria</i></b>       |               |          |           |          |               |          |           |          |               |          |           |          |               |          |           |          |               |          |           |          |
| <b><i>Alphaproteobacteria</i></b>  |               |          |           |          |               |          |           |          |               |          |           |          |               |          |           |          |               |          |           |          |
| SAR11                              | -             | -        | 25.1      | 99       | -             | -        | 48.1      | 10       | 9.8           | 35       | 9.0       | 90       | 5.2           | 29       | 15.1      | 129      | 5.1           | 35       | 12.6      | 166      |
| <i>Alphaproteobacteria</i> _others | -             | -        | 7.4       | 115      | -             | -        | 9.9       | 6        | 4.0           | 110      | 2.9       | 154      | 3.1           | 139      | 4.6       | 226      | 5.1           | 282      | 6.6       | 531      |
| <i>Betaproteobacteria</i>          | -             | -        | 0.3       | 6        | -             | -        | 1.2       | 1        | 0.1           | 4        | 0.1       | 10       | 0.1           | 5        | 0.1       | 4        | 0.2           | 9        | 0.6       | 16       |
| <i>Deltaproteobacteria</i>         | -             | -        | 13.9      | 114      | -             | -        | 3.7       | 3        | 18.8          | 195      | 6.9       | 247      | 17.8          | 315      | 13.9      | 419      | 18.2          | 762      | 14.6      | 1032     |
| <i>Epsilonproteobacteria</i>       | -             | -        | < 0.1     | 1        | -             | -        | 0         | 0        | 0.9           | 23       | 0.3       | 32       | 30.1          | 68       | 15.1      | 175      | 0.9           | 37       | 0.6       | 60       |
| <b><i>Gammaproteobacteria</i></b>  |               |          |           |          |               |          |           |          |               |          |           |          |               |          |           |          |               |          |           |          |
| <i>Colwellia</i>                   | -             | -        | 0.1       | 3        | -             | -        | 0         | 0        | < 0.1         | 4        | 0.1       | 9        | 0.1           | 4        | 0.5       | 15       | < 0.1         | 10       | 0.2       | 11       |
| <i>Oceaniserpentilla</i>           | -             | -        | < 0.1     | 1        | -             | -        | 0         | 0        | 0             | 0        | < 0.1     | 1        | 0.5           | 2        | 1.0       | 12       | < 0.1         | 2        | < 0.1     | 2        |
| <i>Cycloclasticus</i>              | -             | -        | < 0.1     | 2        | -             | -        | 0         | 0        | 0.1           | 4        | < 0.1     | 1        | 0.9           | 6        | 1.1       | 10       | 0.1           | 3        | 0.3       | 12       |
| <i>Gammaproteobacteria</i> _others | -             | -        | 18.7      | 138      | -             | -        | 22.2      | 10       | 32.0          | 202      | 65.5      | 326      | 13.1          | 249      | 18.3      | 484      | 25.0          | 709      | 22.9      | 1175     |
| <i>Proteobacteria</i> _others      | -             | -        | 0         | 0        | -             | -        | 0         | 0        | 0             | 0        | 0         | 1        | < 0.1         | 2        | < 0.1     | 2        | < 0.1         | 3        | < 0.1     | 8        |
| <b><i>Verrucomicrobia</i></b>      |               |          |           |          |               |          |           |          |               |          |           |          |               |          |           |          |               |          |           |          |
| <i>Verrucomicrobiae</i>            | -             | -        | 0.7       | 9        | -             | -        | 0         | 0        | 0.4           | 16       | 0.2       | 11       | 0.1           | 8        | 0.3       | 18       | 0.7           | 72       | 0.7       | 70       |
| <i>Verrucomicrobia</i> _others     | -             | -        | 2.1       | 16       | -             | -        | 1.2       | 1        | 0.8           | 25       | 1.0       | 28       | 0.3           | 21       | 1.4       | 40       | 0.6           | 42       | 1.5       | 74       |
| <b><i>Bacteria</i>_others</b>      | -             | -        | 0.6       | 33       | -             | -        | 0.0       | 1        | 0.8           | 86       | 0.4       | 116      | 4.5           | 273      | 4.5       | 376      | 5.7           | 712      | 6.1       | 975      |

\*Phyla breakdown to class if read abundance of class ≤1%; Groups selected for oligotyping (*Colwellia*, *Oceaniserpentilla*, *Cycloclasticus*, and SAR11) are presented individually.

Supplementary Table S4: Diversity indexes of non-rarefied, rarefied and mean rarefied (average of 100 calculations) OTU tables.

| Sample ID     | Non-rarefied    |                 |                     |                     |              |              |                       | Rarefied        |                 |                     |                     |              |              |                       | Rarefied (mean of 100 calculations) |                 |                     |                     |              |              |                       |
|---------------|-----------------|-----------------|---------------------|---------------------|--------------|--------------|-----------------------|-----------------|-----------------|---------------------|---------------------|--------------|--------------|-----------------------|-------------------------------------|-----------------|---------------------|---------------------|--------------|--------------|-----------------------|
|               | Single-tons (S) | Individuals (N) | Good's coverage (C) | Shannon's Index (H) | Richness (R) | Evenness (E) | Inverse Simpson (1/D) | Single-tons (S) | Individuals (N) | Good's coverage (C) | Shannon's Index (H) | Richness (R) | Evenness (E) | Inverse Simpson (1/D) | Single-tons (S)                     | Individuals (N) | Good's coverage (C) | Shannon's Index (H) | Richness (R) | Evenness (E) | Inverse Simpson (1/D) |
| 1-PRE-MC118   | 117             | 23473           | 1.00                | 5.07                | 811          | 0.76         | 52.81                 | 119             | 21701           | 0.99                | 5.07                | 802          | 0.76         | 52.79                 | 117                                 | 21701           | 0.99                | 5.07                | 811          | 0.76         | 52.79                 |
| 2-PRE-MC118   | 226             | 21701           | 0.99                | 5.01                | 980          | 0.73         | 45.97                 | 226             | 21701           | 0.99                | 5.01                | 980          | 0.73         | 45.97                 | 226                                 | 21701           | 0.99                | 5.01                | 980          | 0.73         | 45.97                 |
| 3-DUR-MC250   | 106             | 22831           | 1.00                | 4.86                | 808          | 0.73         | 40.94                 | 112             | 21701           | 0.99                | 4.86                | 807          | 0.73         | 40.89                 | 106                                 | 21701           | 1.00                | 4.86                | 808          | 0.73         | 40.93                 |
| 4-DUR-MC250   | 492             | 33699           | 0.99                | 1.73                | 749          | 0.26         | 2.32                  | 371             | 21701           | 0.98                | 1.71                | 551          | 0.27         | 2.31                  | 492                                 | 21701           | 0.98                | 1.72                | 749          | 0.26         | 2.32                  |
| 5-DUR-MC250   | 872             | 34905           | 0.98                | 2.88                | 1428         | 0.40         | 5.39                  | 674             | 21701           | 0.97                | 2.87                | 1058         | 0.41         | 5.42                  | 872                                 | 21701           | 0.96                | 2.88                | 1428         | 0.40         | 5.39                  |
| 6-DUR-MC335   | 75              | 8217            | 0.99                | 2.07                | 777          | 0.39         | 21.40                 | 75              | 21701           | 0.99                | 2.07                | 199          | 0.39         | 3.47                  | 148                                 | 21701           | 0.99                | 4.46                | 777          | 0.67         | 21.37                 |
| 7-DUR-MC295   | 115             | 55094           | 1.00                | 0.78                | 347          | 0.13         | 1.30                  | 116             | 21701           | 0.99                | 0.75                | 244          | 0.14         | 1.29                  | 176                                 | 21701           | 0.99                | 0.78                | 347          | 0.13         | 1.30                  |
| 8-DUR-MC295   | 123             | 37348           | 1.00                | 0.59                | 329          | 0.10         | 1.17                  | 115             | 21701           | 0.99                | 0.58                | 268          | 0.10         | 1.16                  | 124                                 | 21701           | 0.99                | 0.59                | 329          | 0.10         | 1.16                  |
| 9-DUR-MC252   | 357             | 36253           | 0.99                | 1.10                | 548          | 0.17         | 1.67                  | 270             | 21701           | 0.99                | 1.09                | 386          | 0.18         | 1.67                  | 358                                 | 21701           | 0.98                | 1.10                | 548          | 0.17         | 1.67                  |
| 10-DUR-MC252  | 215             | 29236           | 0.99                | 4.77                | 1090         | 0.68         | 34.29                 | 232             | 21701           | 0.99                | 4.77                | 1012         | 0.69         | 34.36                 | 215                                 | 21701           | 0.99                | 4.77                | 1090         | 0.68         | 34.30                 |
| 11-DUR-MC252  | 240             | 26953           | 0.99                | 4.24                | 986          | 0.62         | 12.77                 | 263             | 21701           | 0.99                | 4.24                | 943          | 0.62         | 12.75                 | 240                                 | 21701           | 0.99                | 4.24                | 986          | 0.62         | 12.77                 |
| 12-DUR-MC252  | 501             | 44754           | 0.99                | 4.23                | 1405         | 0.58         | 9.99                  | 448             | 21701           | 0.98                | 4.21                | 1065         | 0.60         | 9.96                  | 640                                 | 21701           | 0.97                | 4.23                | 1405         | 0.58         | 9.98                  |
| 13-DUR-MC205  | 531             | 34838           | 0.98                | 4.43                | 1391         | 0.61         | 20.15                 | 492             | 21701           | 0.98                | 4.42                | 1158         | 0.63         | 19.91                 | 531                                 | 21701           | 0.98                | 4.43                | 1391         | 0.61         | 20.16                 |
| 14-POST-MC422 | 423             | 37265           | 0.99                | 3.71                | 973          | 0.54         | 12.05                 | 363             | 21701           | 0.98                | 3.70                | 764          | 0.56         | 11.97                 | 426                                 | 21701           | 0.98                | 3.71                | 973          | 0.54         | 12.04                 |
| 15-POST-MC298 | 148             | 29530           | 0.99                | 4.46                | 199          | 0.67         | 3.47                  | 160             | 8217            | 0.99                | 4.45                | 731          | 0.68         | 21.24                 | 75                                  | 8217            | 0.99                | 2.07                | 199          | 0.39         | 3.47                  |
| 16-POST-MC297 | 137             | 32386           | 1.00                | 4.80                | 917          | 0.70         | 33.12                 | 172             | 21701           | 0.99                | 4.79                | 858          | 0.71         | 32.93                 | 137                                 | 21701           | 0.99                | 4.80                | 917          | 0.70         | 33.18                 |
| 17-POST-GC600 | 29              | 84              | 0.65                | 3.29                | 42           | 0.88         | 16.18                 | 29              | 84              | 0.65                | 3.29                | 42           | 0.88         | 16.18                 | 29                                  | 84              | 0.65                | 3.29                | 42           | 0.88         | 16.18                 |
| 18-POST-GC600 | 763             | 51024           | 0.99                | 3.60                | 1640         | 0.49         | 6.87                  | 581             | 21701           | 0.97                | 3.57                | 1092         | 0.51         | 6.83                  | 1044                                | 21701           | 0.95                | 3.60                | 1640         | 0.49         | 6.86                  |
| 19-POST-MC252 | 1759            | 29666           | 0.94                | 5.60                | 2997         | 0.70         | 58.89                 | 1506            | 21701           | 0.93                | 5.57                | 2511         | 0.71         | 59.03                 | 1759                                | 21701           | 0.92                | 5.60                | 2997         | 0.70         | 58.94                 |
| 20-POST-MC253 | 4600            | 30700           | 0.85                | 6.74                | 6835         | 0.76         | 93.88                 | 3685            | 21701           | 0.83                | 6.66                | 5375         | 0.77         | 92.45                 | 4600                                | 21701           | 0.79                | 6.74                | 6835         | 0.76         | 93.94                 |



**Supplementary Table S5. Significant ( $\alpha < 0.05$ ) and Storey's FDR-controlled ( $q < 0.05$ ) Spearman rank correlations between untransformed environmental parameters and oligotype abundances.**

| Oligotype            | Methane | Methane<br>Oxidation rate | Cell counts | DOC  | NOx  | CDOM  |
|----------------------|---------|---------------------------|-------------|------|------|-------|
| Oceaniserpentilla_17 | 0.74    | -                         | 0.77        | -    | -    | -     |
| Oceaniserpentilla_20 | -       | -                         | -           | 0.73 | -    | -     |
| Cycloclasticus_01    | -       | 0.71                      | -           | -    | -    | -     |
| Cycloclasticus_04    | 0.73    | -                         | -           | -    | -    | -     |
| Cycloclasticus_06    | 0.72    | 0.74                      | -           | -    | -    | -     |
| Cycloclasticus_30    | 0.78    | 0.76                      | 0.79        | -    | -    | -     |
| Colwellia_01         | 0.74    | 0.71                      | -           | -    | -    | -     |
| Colwellia_02         | 0.71    | -                         | -           | -    | -    | -     |
| Colwellia_03         | 0.73    | -                         | 0.74        | -    | -    | -     |
| Colwellia_04         | 0.78    | 0.75                      | -           | -    | -    | -     |
| Colwellia_06         | 0.77    | -                         | -           | -    | -    | -     |
| Colwellia_08         | -       | -                         | 0.76        | -    | -    | -     |
| Colwellia_09         | 0.81    | 0.75                      | -           | -    | -    | -     |
| SAR11_04             | -       | -                         | -0.75       | -    | -    | -     |
| SAR11_06             | -       | -                         | -           | -    | -    | -0.85 |
| SAR11_16             | -       | -                         | -           | -    | -    | -0.86 |
| SAR11_30             | -       | -                         | -0.75       | -    | 0.73 | -     |
| SAR11_37             | -       | -0.70                     | -           | -    | -    | -     |
| SAR11_42             | -0.75   | -0.71                     | -0.81       | -    | -    | -     |
| SAR11_43             | -       | -0.71                     | -           | -    | -    | -     |
| SAR11_48             | -       | -                         | -0.76       | -    | 0.71 | -     |
| SAR11_51             | -       | -                         | -           | -    | 0.72 | -     |
| SAR11_53             | -       | -                         | -0.79       | -    | 0.79 | -     |
| SAR11_59             | -       | -                         | -0.75       | -    | -    | -     |
| SAR11_66             | -0.72   | -0.72                     | -0.78       | -    | 0.76 | -     |
| SAR11_67             | -       | -                         | -           | -    | -    | -0.92 |
| SAR11_68             | -       | -                         | -           | -    | 0.84 | -     |
| SAR11_69             | -       | -                         | -           | -    | 0.75 | -     |
| SAR11_73             | -       | -                         | -           | -    | 0.77 | -     |
| SAR11_83             | -       | -                         | -0.75       | -    | -    | -     |
| SAR11_88             | -       | -                         | -0.75       | -    | -    | -     |
| SAR11_90             | -0.71   | -0.71                     | -           | -    | -    | -     |
| SAR11_95             | -       | -                         | -0.78       | -    | -    | -     |
| SAR11_96             | -       | -                         | -           | -    | 0.71 | -     |

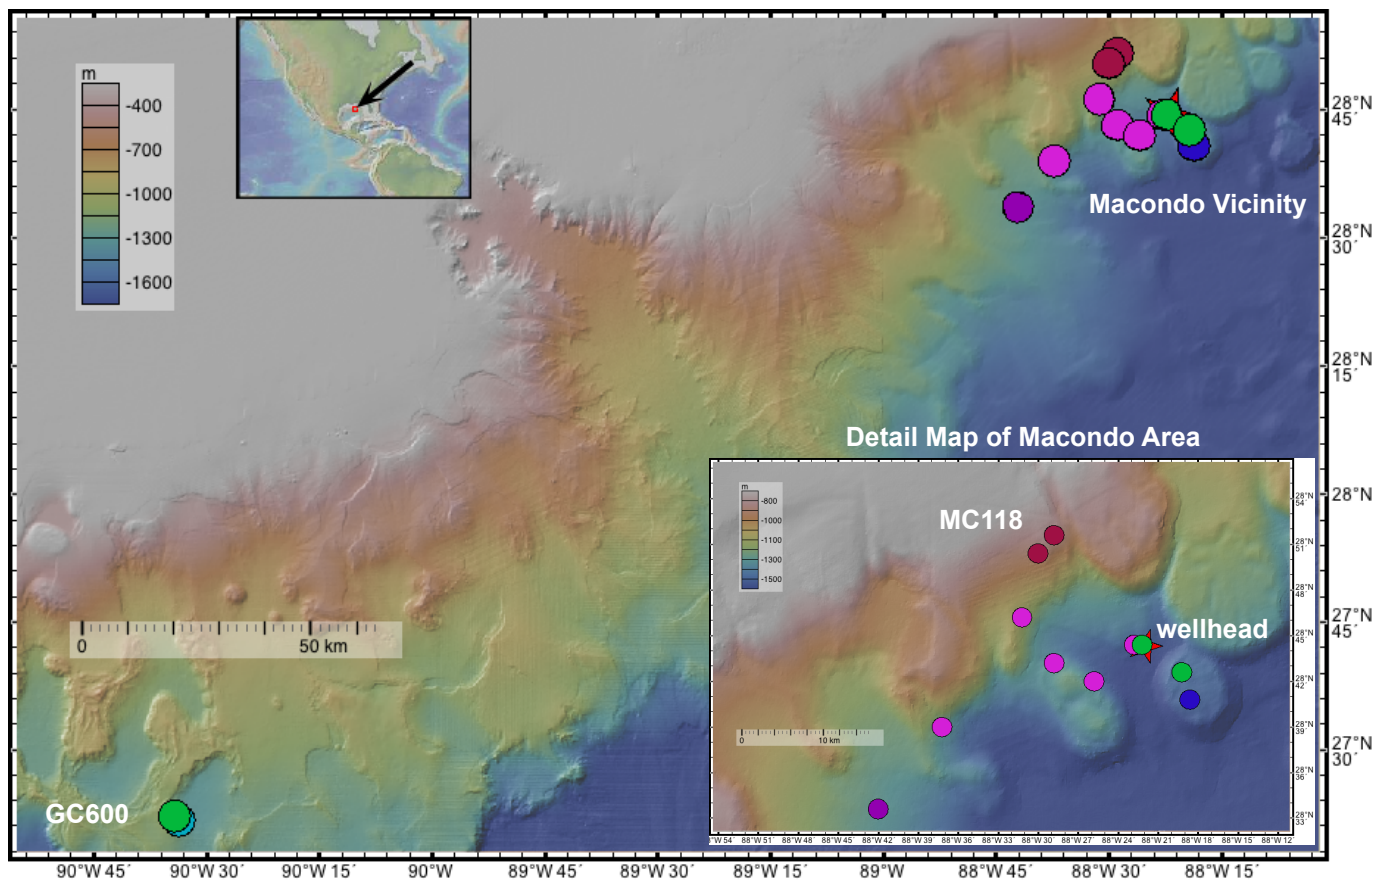

Kleindienst et al. Supplementary Figure S1

**A** *Oceaniserpentilla*

| Samples          | Pre-DC        |             | During discharge |             |             |             |             |             |             |              |              |              |              |               |               |               |               |               | Post-discharge |               |     |     |
|------------------|---------------|-------------|------------------|-------------|-------------|-------------|-------------|-------------|-------------|--------------|--------------|--------------|--------------|---------------|---------------|---------------|---------------|---------------|----------------|---------------|-----|-----|
|                  | 1-PRE-MC118   | 2-PRE-MC118 | 3-DUR-MC250      | 4-DUR-MC250 | 5-DUR-MC250 | 6-DUR-MC335 | 7-DUR-MC295 | 8-DUR-MC295 | 9-DUR-MC252 | 10-DUR-MC252 | 11-DUR-MC252 | 12-DUR-MC252 | 13-DUR-MC205 | 14-POST-MC422 | 15-POST-MC298 | 16-POST-MC297 | 17-POST-GC600 | 18-POST-GC600 | 19-POST-MC252  | 20-POST-MC253 |     |     |
| Pre-DC           | 1-PRE-MC118   | 0           | 0.0              | 1.0         | 1.0         | 1.0         | 1.0         | 1.0         | 1.0         | 1.0          | 1.0          | 1.0          | 1.0          | 1.0           | 1.0           | 1.0           | 1.0           | 1.0           | 1.0            | 1.0           | 1.0 |     |
|                  | 2-PRE-MC118   | 0.0         | 0                | 1.0         | 1.0         | 1.0         | 1.0         | 1.0         | 1.0         | 1.0          | 1.0          | 1.0          | 1.0          | 1.0           | 1.0           | NA            | NA            | NA            | 1.0            | 1.0           | 1.0 |     |
| During discharge | 3-DUR-MC250   | 1.0         | 1.0              | 0           | 0           | 0.0         | 0.0         | 0.0         | 0.0         | 0.0          | 0.0          | 0.0          | 0.0          | 0.0           | 0.0           | 0.1           | NA            | NA            | NA             | 1.0           | 1.0 | 0.0 |
|                  | 4-DUR-MC250   | 1.0         | 1.0              | 0.0         | 0           | 0.0         | 0.0         | 0.0         | 0.0         | 0.0          | 0.0          | 0.0          | 0.0          | 0.0           | 0.0           | 0.2           | NA            | NA            | NA             | 0.2           | 1.0 | 0.0 |
|                  | 5-DUR-MC250   | 1.0         | 1.0              | 0.0         | 0           | 0           | 0           | 0           | 0           | 0            | 0            | 0            | 0            | 0             | 0             | 0.1           | NA            | NA            | NA             | 0.2           | 1.0 | 0.0 |
|                  | 6-DUR-MC335   | 1.0         | 1.0              | 0.0         | 0.0         | 0.0         | 0           | 0           | 0           | 0            | 0            | 0            | 0            | 0             | 0             | 0.2           | NA            | NA            | NA             | 0.2           | 1.0 | 0.0 |
|                  | 7-DUR-MC295   | 1.0         | 1.0              | 0.0         | 0.0         | 0.0         | 0           | 0           | 0           | 0            | 0            | 0            | 0            | 0             | 0.2           | NA            | NA            | NA            | 0.2            | 1.0           | 0.0 |     |
|                  | 8-DUR-MC295   | 1.0         | 1.0              | 0.0         | 0.0         | 0.0         | 0.0         | 0           | 0           | 0            | 0            | 0            | 0            | 0             | 0.2           | NA            | NA            | NA            | 0.2            | 1.0           | 0.0 |     |
|                  | 9-DUR-MC252   | 1.0         | 1.0              | 0.0         | 0.0         | 0.0         | 0.0         | 0           | 0           | 0            | 0            | 0            | 0            | 0             | 0.2           | NA            | NA            | NA            | 0.2            | 1.0           | 0.0 |     |
|                  | 10-DUR-MC252  | 1.0         | 1.0              | 0.0         | 0.0         | 0.0         | 0.0         | 0           | 0           | 0            | 0            | 0            | 0            | 0             | 0.1           | NA            | NA            | NA            | 0.2            | 1.0           | 0.0 |     |
|                  | 11-DUR-MC252  | 1.0         | 1.0              | 0.0         | 0.0         | 0.0         | 0.0         | 0           | 0           | 0            | 0            | 0            | 0            | 0             | 0.2           | NA            | NA            | NA            | 0.2            | 1.0           | 0.0 |     |
|                  | 12-DUR-MC252  | 1.0         | 1.0              | 0.0         | 0.0         | 0.0         | 0.0         | 0           | 0           | 0            | 0            | 0            | 0            | 0             | 0.2           | NA            | NA            | NA            | 0.2            | 1.0           | 0.0 |     |
|                  | 13-DUR-MC205  | 1.0         | 1.0              | 0.0         | 0.0         | 0.0         | 0.0         | 0           | 0           | 0            | 0            | 0            | 0            | 0             | 0.2           | NA            | NA            | NA            | 0.2            | 1.0           | 0.0 |     |
| Post-discharge   | 14-POST-MC422 | 1.0         | 1.0              | 0.1         | 0.2         | 0.1         | 0.2         | 0.2         | 0.2         | 0.2          | 0.1          | 0.2          | 0.2          | 0.2           | 0             | NA            | NA            | NA            | 0.1            | 0.5           | 0.2 |     |
|                  | 15-POST-MC298 | NA          | NA               | NA          | NA          | NA          | NA          | NA          | NA          | NA           | NA           | NA           | NA           | NA            | 0             | NA            | NA            | NA            | NA             | NA            | NA  |     |
|                  | 16-POST-MC297 | NA          | NA               | NA          | NA          | NA          | NA          | NA          | NA          | NA           | NA           | NA           | NA           | NA            | 0             | NA            | NA            | NA            | NA             | NA            | NA  |     |
|                  | 17-POST-GC600 | NA          | NA               | NA          | NA          | NA          | NA          | NA          | NA          | NA           | NA           | NA           | NA           | NA            | 0             | NA            | NA            | NA            | NA             | NA            | NA  |     |
|                  | 18-POST-GC600 | 1.0         | 1.0              | 0.2         | 0.2         | 0.2         | 0.2         | 0.2         | 0.2         | 0.2          | 0.2          | 0.2          | 0.2          | 0.2           | 0.1           | NA            | NA            | NA            | 0              | 0.6           | 0.3 |     |
|                  | 19-POST-MC252 | 1.0         | 1.0              | 1.0         | 1.0         | 1.0         | 1.0         | 1.0         | 1.0         | 1.0          | 1.0          | 1.0          | 1.0          | 0.5           | NA            | NA            | NA            | NA            | 0.6            | 0             | 1.0 |     |
|                  | 20-POST-MC253 | 1.0         | 1.0              | 0.0         | 0.0         | 0.0         | 0.0         | 0.0         | 0.0         | 0.0          | 0.0          | 0.0          | 0.0          | 0.2           | NA            | NA            | NA            | 0.3           | 1.0            | 0             | 0   |     |

**B** *Cycloclasticus*

| Samples          | Pre-DC        |             | During discharge |             |             |             |             |             |             |              |              |              |              |               |               |               |               |               | Post-discharge |               |     |  |
|------------------|---------------|-------------|------------------|-------------|-------------|-------------|-------------|-------------|-------------|--------------|--------------|--------------|--------------|---------------|---------------|---------------|---------------|---------------|----------------|---------------|-----|--|
|                  | 1-PRE-MC118   | 2-PRE-MC118 | 3-DUR-MC250      | 4-DUR-MC250 | 5-DUR-MC250 | 6-DUR-MC335 | 7-DUR-MC295 | 8-DUR-MC295 | 9-DUR-MC252 | 10-DUR-MC252 | 11-DUR-MC252 | 12-DUR-MC252 | 13-DUR-MC205 | 14-POST-MC422 | 15-POST-MC298 | 16-POST-MC297 | 17-POST-GC600 | 18-POST-GC600 | 19-POST-MC252  | 20-POST-MC253 |     |  |
| Pre-DC           | 1-PRE-MC118   | 0           | 0.0              | 0.0         | 0.0         | 0.5         | 0.0         | 0.0         | 0.1         | 0.0          | 0.1          | 0.0          | 0.0          | 0.1           | 1.0           | 1.0           | 1.0           | NA            | 0.9            | 0.5           | 1.0 |  |
|                  | 2-PRE-MC118   | 0.0         | 0                | 0           | 0           | 0.4         | 0.0         | 0.0         | 0.0         | 0.0          | 0.0          | 0.0          | 0.0          | 0.0           | 0.9           | 0.9           | 0.9           | NA            | 1.0            | 0.4           | 1.0 |  |
| During discharge | 3-DUR-MC250   | 0.0         | 0.0              | 0           | 0           | 0.4         | 0.0         | 0.0         | 0.0         | 0.0          | 0.0          | 0.0          | 0.0          | 0.0           | 1.0           | 1.0           | 1.0           | NA            | 1.0            | 0.4           | 1.0 |  |
|                  | 4-DUR-MC250   | 0.0         | 0.0              | 0           | 0           | 0.4         | 0.0         | 0.0         | 0.0         | 0.0          | 0.0          | 0.0          | 0.0          | 0.0           | 1.0           | 1.0           | 1.0           | NA            | 1.0            | 0.4           | 1.0 |  |
|                  | 5-DUR-MC250   | 0.5         | 0.4              | 0.4         | 0.4         | 0           | 0.4         | 0.4         | 0.3         | 0.4          | 0.3          | 0.4          | 0.3          | 0.5           | 0.6           | 0.6           | NA            | 1.0           | 0.5            | 1.0           | 0   |  |
|                  | 6-DUR-MC335   | 0.0         | 0.0              | 0.0         | 0.4         | 0           | 0           | 0           | 0           | 0            | 0            | 0            | 0            | 0             | 1.0           | 1.0           | 1.0           | NA            | 1.0            | 0.3           | 1.0 |  |
|                  | 7-DUR-MC295   | 0.0         | 0.0              | 0.0         | 0.0         | 0.4         | 0           | 0           | 0           | 0            | 0            | 0            | 0            | 0             | 1.0           | 1.0           | 1.0           | NA            | 1.0            | 0.3           | 1.0 |  |
|                  | 8-DUR-MC295   | 0.1         | 0.0              | 0.0         | 0.0         | 0.3         | 0.0         | 0.0         | 0           | 0.0          | 0.0          | 0.0          | 0.0          | 1.0           | 1.0           | 1.0           | NA            | 1.0           | 0.3            | 1.0           | 0   |  |
|                  | 9-DUR-MC252   | 0.0         | 0.0              | 0.0         | 0.0         | 0.4         | 0.0         | 0.0         | 0.0         | 0.0          | 0.0          | 0.0          | 0.0          | 1.0           | 1.0           | 1.0           | NA            | 1.0           | 0.4            | 1.0           | 0   |  |
|                  | 10-DUR-MC252  | 0.1         | 0.0              | 0.0         | 0.0         | 0.3         | 0.0         | 0.0         | 0.0         | 0            | 0.0          | 0.0          | 0.0          | 1.0           | 1.0           | 1.0           | NA            | 1.0           | 0.3            | 1.0           | 0   |  |
|                  | 11-DUR-MC252  | 0.0         | 0.0              | 0.0         | 0.4         | 0.0         | 0.0         | 0.0         | 0.0         | 0            | 0.0          | 0.0          | 0            | 1.0           | 1.0           | 1.0           | NA            | 1.0           | 0.4            | 1.0           | 0   |  |
|                  | 12-DUR-MC252  | 0.0         | 0.0              | 0.0         | 0.0         | 0.4         | 0.0         | 0.0         | 0.0         | 0.0          | 0            | 0            | 0            | 1.0           | 1.0           | 1.0           | NA            | 1.0           | 0.4            | 1.0           | 0   |  |
|                  | 13-DUR-MC205  | 0.1         | 0.0              | 0.0         | 0.0         | 0.3         | 0.0         | 0.0         | 0.0         | 0.0          | 0.0          | 0            | 0            | 1.0           | 1.0           | 1.0           | NA            | 1.0           | 0.3            | 1.0           | 0   |  |
| Post-discharge   | 14-POST-MC422 | 1.0         | 0.9              | 1.0         | 1.0         | 0.5         | 1.0         | 1.0         | 1.0         | 1.0          | 1.0          | 1.0          | 1.0          | 0             | 0             | 0.2           | NA            | 1.0           | 1.0            | 1.0           | 0   |  |
|                  | 15-POST-MC298 | 1.0         | 0.9              | 1.0         | 1.0         | 0.6         | 1.0         | 1.0         | 1.0         | 1.0          | 1.0          | 1.0          | 1.0          | 0             | 0.3           | NA            | 1.0           | 1.0           | 1.0            | 1.0           | 0   |  |
|                  | 16-POST-MC297 | 1.0         | 0.9              | 1.0         | 1.0         | 0.6         | 1.0         | 1.0         | 1.0         | 1.0          | 1.0          | 1.0          | 1.0          | 0.2           | 0.3           | 0             | NA            | 1.0           | 1.0            | 1.0           | 0   |  |
|                  | 17-POST-GC600 | NA          | NA               | NA          | NA          | NA          | NA          | NA          | NA          | NA           | NA           | NA           | NA           | NA            | NA            | 0             | NA            | NA            | NA             | NA            | NA  |  |
|                  | 18-POST-GC600 | 0.9         | 1.0              | 1.0         | 1.0         | 1.0         | 1.0         | 1.0         | 1.0         | 1.0          | 1.0          | 1.0          | 1.0          | 1.0           | 1.0           | 1.0           | NA            | 0             | 1.0            | 1.0           | 0   |  |
|                  | 19-POST-MC252 | 0.5         | 0.4              | 0.4         | 0.4         | 0.5         | 0.3         | 0.3         | 0.3         | 0.4          | 0.3          | 0.4          | 0.3          | 0.4           | 0.3           | 0.4           | NA            | 1.0           | 1.0            | 1.0           | 0   |  |
|                  | 20-POST-MC253 | 1.0         | 1.0              | 1.0         | 1.0         | 1.0         | 1.0         | 1.0         | 1.0         | 1.0          | 1.0          | 1.0          | 1.0          | 1.0           | 1.0           | 1.0           | NA            | 1.0           | 1.0            | 1.0           | 0   |  |

**C** *Colwellia*

| Samples          | Pre-DC        |             | During discharge |             |             |             |             |             |             |              |              |              |              |               |               |               |               |               | Post-discharge |               |     |  |
|------------------|---------------|-------------|------------------|-------------|-------------|-------------|-------------|-------------|-------------|--------------|--------------|--------------|--------------|---------------|---------------|---------------|---------------|---------------|----------------|---------------|-----|--|
|                  | 1-PRE-MC118   | 2-PRE-MC118 | 3-DUR-MC250      | 4-DUR-MC250 | 5-DUR-MC250 | 6-DUR-MC335 | 7-DUR-MC295 | 8-DUR-MC295 | 9-DUR-MC252 | 10-DUR-MC252 | 11-DUR-MC252 | 12-DUR-MC252 | 13-DUR-MC205 | 14-POST-MC422 | 15-POST-MC298 | 16-POST-MC297 | 17-POST-GC600 | 18-POST-GC600 | 19-POST-MC252  | 20-POST-MC253 |     |  |
| Pre-DC           | 1-PRE-MC118   | 0           | 0.0              | 0.8         | 0.9         | 0.6         | 0.9         | 0.8         | 1.0         | 0.7          | 0.8          | 1.0          | 0.9          | 0.9           | 0.6           | 1.0           | 1.0           | NA            | 0.6            | 1.0           | 0.7 |  |
|                  | 2-PRE-MC118   | 0.0         | 0                | 0.8         | 0.9         | 0.6         | 0.9         | 0.8         | 1.0         | 0.7          | 0.8          | 1.0          | 0.9          | 0.9           | 0.6           | 1.0           | 1.0           | NA            | 0.6            | 1.0           | 0.7 |  |
| During discharge | 3-DUR-MC250   | 0.8         | 0.8              | 0           | 0.3         | 0.2         | 0.1         | 0.2         | 0.4         | 0.4          | 0.3          | 0.4          | 0.3          | 0.1           | 0.2           | 0.9           | NA            | 0.6           | 0.5            | 0.3           | 0   |  |
|                  | 4-DUR-MC250   | 0.9         | 0.9              | 0.3         | 0           | 0.6         | 0.4         | 0.1         | 0.3         | 0.5          | 0.1          | 0.0          | 0.1          | 0.3           | 0.3           | 1.0           | NA            | 0.7           | 0.2            | 0.3           | 0   |  |
|                  | 5-DUR-MC250   | 0.6         | 0.6              | 0.2         | 0.6         | 0           | 0.2         | 0.4         | 0.6         | 0.3          | 0.6          | 0.8          | 0.6          | 0.2           | 0.2           | 1.0           | NA            | 0.5           | 0.8            | 0.4           | 0   |  |
|                  | 6-DUR-MC335   | 0.9         | 0.9              | 0.1         | 0.4         | 0.2         | 0           | 0.3         | 0.6         | 0.5          | 0.4          | 0.5          | 0.4          | 0.2           | 0.3           | 1.0           | NA            | 0.6           | 0.5            | 0.4           | 0   |  |
|                  | 7-DUR-MC295   | 0.8         | 0.8              | 0.2         | 0.1         | 0.4         | 0.3         | 0           | 0.2         | 0.2          | 0.2          | 0.1          | 0.1          | 0.1           | 1.0           | 1.0           | NA            | 0.6           | 0.4            | 0.2           | 0   |  |
|                  | 8-DUR-MC295   | 1.0         | 1.0              | 0.4         | 0.3         | 0.6         | 0.6         | 0.2         | 0           | 0.1          | 0.3          | 0.3          | 0.2          | 0.2           | 0.4           | 1.0           | NA            | 0.8           | 0.5            | 0.5           | 0   |  |
|                  | 9-DUR-MC252   | 0.7         | 0.7              | 0.4         | 0.5         | 0.3         | 0.5         | 0.2         | 0.1         | 0            | 0.5          | 0.6          | 0.4          | 0.1           | 0.3           | 1.0           | NA            | 0.7           | 0.8            | 0.5           | 0   |  |
|                  | 10-DUR-MC252  | 0.8         | 0.8              | 0.3         | 0.1         | 0.6         | 0.4         | 0.2         | 0.3         | 0.5          | 0            | 0.1          | 0.0          | 0.3           | 0.2           | 1.0           | NA            | 0.6           | 0.1            | 0.1           | 0   |  |
|                  | 11-DUR-MC252  | 1.0         | 1.0              | 0.4         | 0.0         | 0.8         | 0.5         | 0.2         | 0.3         | 0.6          | 0.1          | 0            | 0.1          | 0.4           | 0.4           | 1.0           | NA            | 0.7           | 0.1            | 0.3           | 0   |  |
|                  | 12-DUR-MC252  | 0.9         | 0.9              | 0.3         | 0.1         | 0.6         | 0.4         | 0.1         | 0.2         | 0.4          | 0.0          | 0.1          | 0            | 0.3           | 0.2           | 1.0           | NA            | 0.6           | 0.1            | 0.2           | 0   |  |
|                  | 13-DUR-MC205  | 0.9         | 0.9              | 0.1         | 0.3         | 0.2         | 0.2         | 0.1         | 0.2         | 0.1          | 0.3          | 0.4          | 0.3          | 0             | 0.2           | 1.0           | NA            | 0.6           | 0.6            | 0.4           | 0   |  |
| Post-discharge   | 14-POST-MC422 | 0.6         | 0.6              | 0.2         | 0.3         | 0.2         | 0.3         | 0.1         | 0.4         | 0.3          | 0.2          | 0.4          | 0.2          | 0.2           | 0             | 1.0           | NA            | 0.4           | 0.4            | 0.1           | 0   |  |
|                  | 15-POST-MC298 | 1.0         | 1.0              | 1.0         | 1.0         | 1.0         | 1.0         | 1.0         | 1.0         | 1.0          | 1.0          | 1.0          | 1.0          | 0.3           | NA            | 0             | NA            | 0.7           | 1.0            | 1.0           | 0   |  |
|                  | 16-POST-MC297 | 1.0         | 1.0              | 0.9         | 1.0         | 1.0         | 1.0         | 1.0         | 1.0         | 1.0          | 1.0          | 1.0          | 1.0          | 0.3           | 0             | NA            | 0.7           | 1.0           | 1.0            | 0             | 0   |  |
|                  | 17-POST-GC600 | NA          | NA               | NA          | NA          | NA          | NA          | NA          | NA          | NA           | NA           | NA           | NA           | NA            | NA            | 0             | NA            | NA            | NA             | NA            | NA  |  |
|                  | 18-POST-GC600 | 0.6         | 0.6              | 0.6         | 0.7         | 0.5         | 0.6         | 0.6         | 0.8         | 0.7          | 0.6          | 0.7          | 0.6          | 0.6           | 0.4           | 0.7           | NA            | 0             | 0.7            |               |     |  |

**Oligotype sequence #**

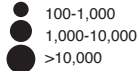

**Oligotype relative abundance**

>5% during DWH oil spill

**Oligotype significant correlation**

[CH<sub>4</sub>] Methane

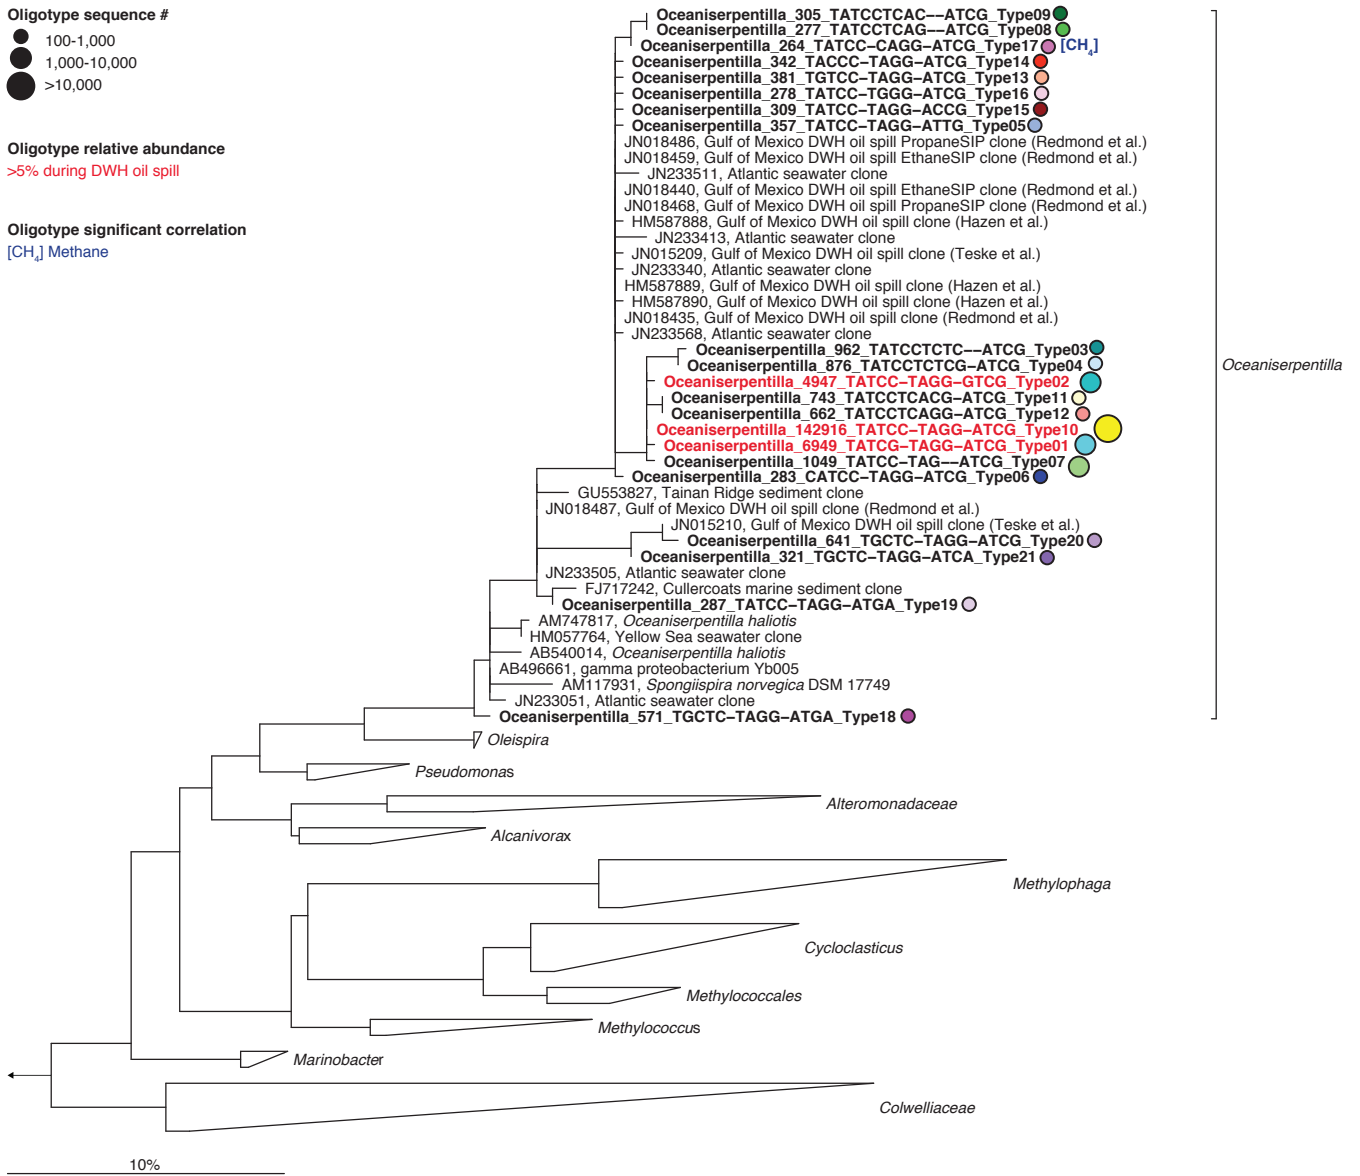

**Kleindienst et al. Supplementary Figure S3**

Oligotype sequence #

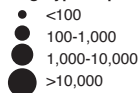

Oligotype relative abundance

>5% during DWH oil spill

Oligotype significant correlation

[CH<sub>4</sub>] Methane

[MOx] Methane oxidation

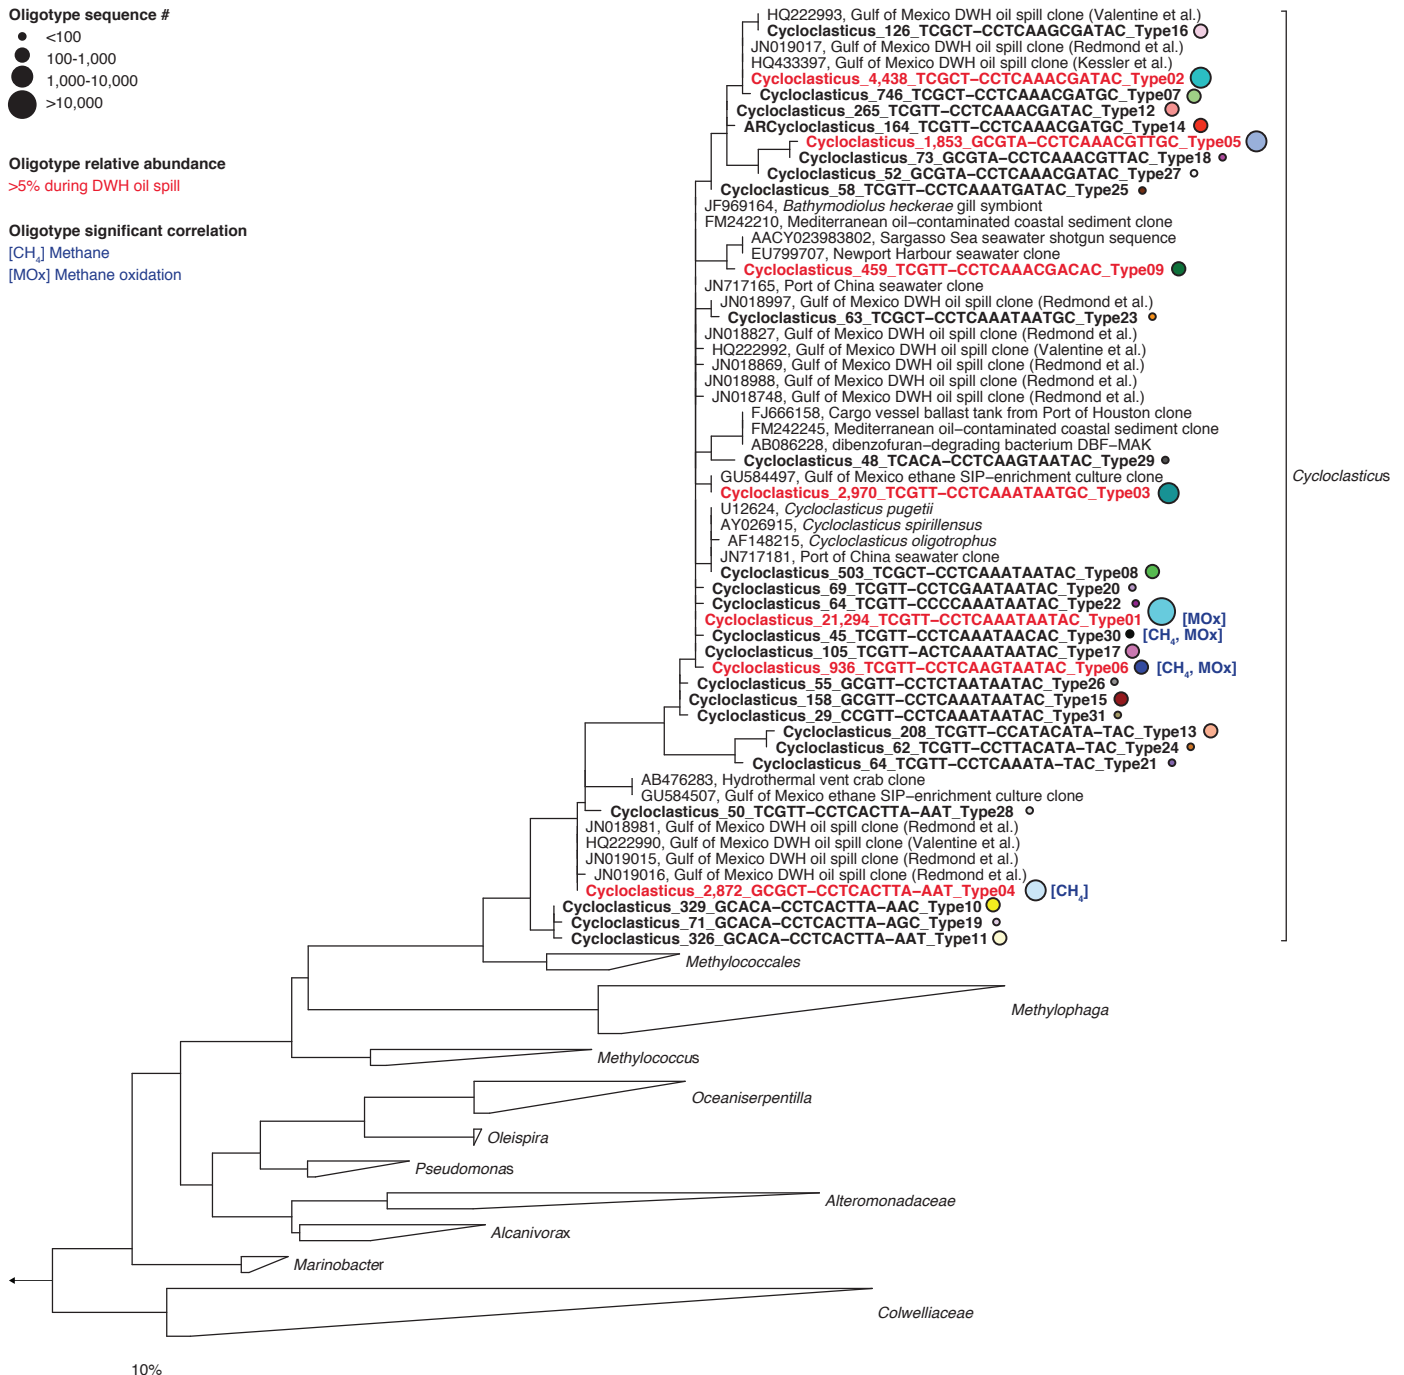

Kleindienst et al. Supplementary Figure S4

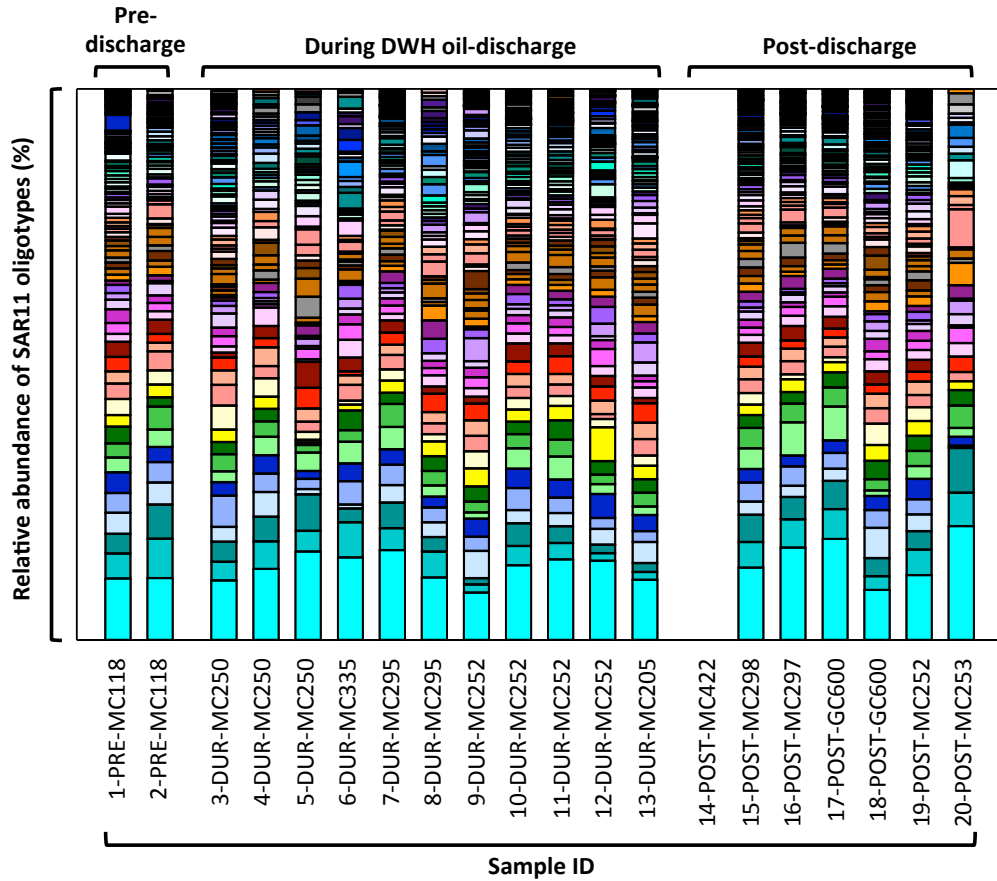

**SAR11 oligotype #**

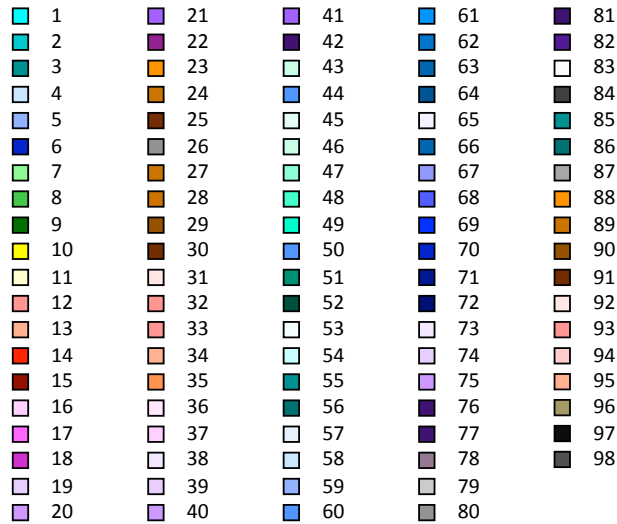

## **Supplementary Material - Example oligotyping procedure of *Colwellia* sp. sequences.**

Oligotyping (1) uses information entropy in aligned nucleotide sequences in order to partition closely-related (>97% similarity) sequences into more meaningful biological and/or ecological groups, or oligotypes. Here we demonstrate the oligotyping procedure on sequences that had been assigned to the genus *Colwellia* (Gammaproteobacteria). The full pipeline and python scripts for oligotyping are available for download at <http://oligotyping.org>.

**Step 1. Sequence pre-processing.** We used 454 pyrosequencing of the bacterial 16S rRNA V4-V6 regions (2, 3) to profile our samples. At the time of the experiment, the GS FLX Titanium chemistry involved unidirectional sequencing from the end of the V6 region into the V4 region. As sequencing progresses along each molecule, the per-base quality decays, and noise and sequencing error rate increases. In order to minimize sequencing error artifacts in oligotyping, we opted to trim the end of the read (in the V4 region) to a known nucleotide sequence before substantial quality decay, in a process known as anchor trimming. This procedure significantly reduces artificially introduced noise. We anchor trimmed all sequences from our datasets that underwent the oligotyping procedure to minimize such sequencing errors.

**Step 2. Sequence alignment and entropy decomposition.** The next steps in the procedure are alignment and entropy decomposition. We extracted sequences that classified as *Colwellia* from the Greengenes database, which had been aligned along the full 16S rRNA region. These fifty-two sequences were used as a template, against which we aligned the 26,217 anchor-trimmed *Colwellia* sequences from our datasets. After

alignment, we trimmed off stray ends so that all sequences under consideration started and ended at the same position. Next, we used the oligotyping script entropy-analysis to calculate per-base Shannon entropy values of the aligned sequences. The script generates a bar chart of entropy along the sequences, as well as a text file of entropy values per base (Fig. 1).

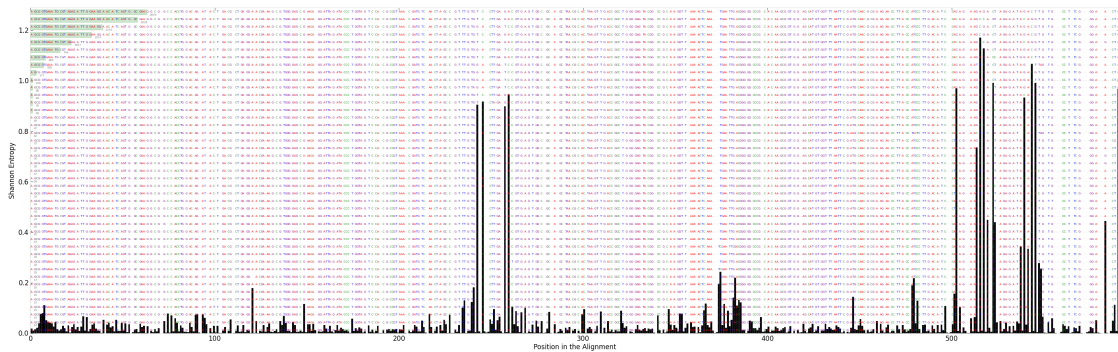

**Fig. 1.** Entropy values of each base of the aligned, anchor-trimmed sequences. From left to right, the reads proceed into the end of the V6 region.

**Step 3. Oligotype calculation.** At this stage, the script oligotype takes the entropy values, the aligned sequences, and either the highest entropy position(s) (by default, the first highest position) or user-provided entropy positions (as many as provided), along with other optional variables, and disaggregates the sequences into oligotypes based on the provided position(s). For *Colwellia*, the highest entropy position at 515 separated sequences into five oligotypes, naming them by their nucleotide or gap position. These four oligotypes were “C”, “A”, “T”, “G”, and “-”. Sequences within each oligotype were uniqued, and entropy values were calculated for these sequences to determine if this step of oligotyping had sufficiently reduced entropy within oligotypes, or if oligotyping with additional positions would improve entropy reduction. If the majority of sequences within



each oligotype do not fall into the most abundant unique bin, then additional oligotyping is recommended using selected positions that describe where sequences disagree (Fig. 2).

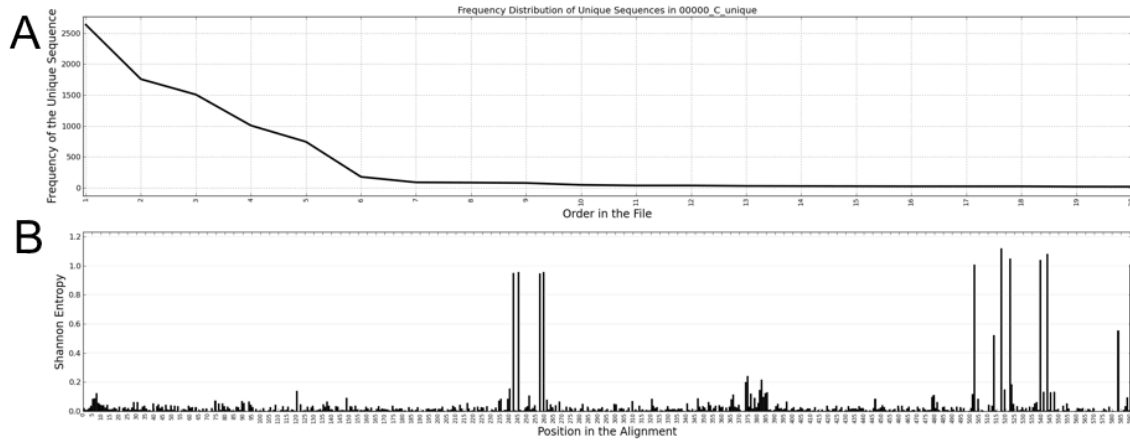

**Fig. 2.** Abundance distribution of sequences in the “C” oligotype of *Colwellia* sequences (A) and entropy values at each position (B). In A, unique sequences are ranked in abundance within each oligotype, and their ranks are plotted on the horizontal axis. The frequencies of each unique sequence are plotted on the vertical axis. In B, the entropy values for the sequences in the “C” oligotype are shown.

As seen in Fig. 2, the most abundant unique sequence in the “C” oligotype had over 2500 representatives, and the next most abundant unique sequence had over 1500 representatives. Careful evaluation of these two unique bins suggested that including other positions in the oligotyping step would separate these bins into different oligotypes. Looking at the other oligotypes and their unique sequences, we observed that their entropy decomposition was more saturated (Fig. 3). Unlike for “C”, including additional entropy positions from these oligotypes would not refine these unique sequence bins.

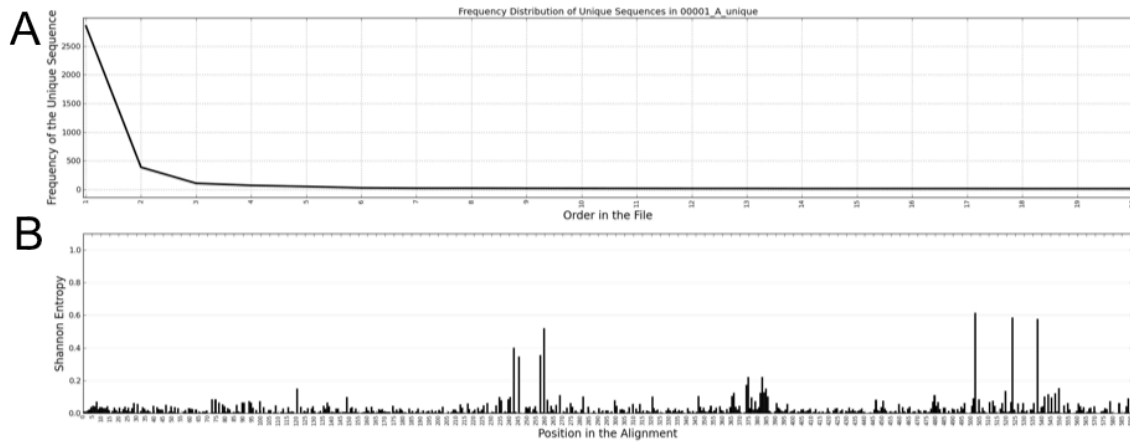

**Fig. 3.** Abundance distribution of sequences in the “A” oligotype of *Colwellia* sequences (A) and entropy values at each position (B). Profiles are similar for “G”, “T”, and “-“ oligotypes.

Oligotyping with the first entropy position 515 and an additional position determined from examining the “C” oligotype bin, 543, generated 19 oligotypes. Much like with the first round of oligotyping, further scrutiny of unique sequences and entropy within each oligotype indicated the selection of additional positions for oligotyping. Additionally, the distribution of oligotypes had a long tail of low-abundance oligotypes. Optional parameters that can be used in oligotyping include the elimination of: oligotypes that are not present across a set number of samples; oligotypes that fall below a minimum abundance proportion of all sequences; and oligotypes with unique sequence bins below a minimum abundance threshold. To refine the oligotyping procedure, we opted to retain an oligotype that: appeared in at least 10% of the samples analyzed; was at least 0.1% of all *Colwellia* sequences in at least one sample; and in which the most abundant unique sequence was at least 0.05% of all *Colwellia* sequences. There were 19 samples in which 26,217 *Colwellia* sequences were observed, and we determined 13 nucleotide positions in total that yielded informative oligotypes (Table 1).

**Table 1.** *Colwellia* oligotypes after procedure using 13 high-entropy positions.

| Abundance | Oligotype name | Closest BLAST hit | % similarity (100 unless otherwise stated) |
|-----------|----------------|-------------------|--------------------------------------------|
| 5,568     | TGCAGGAGATACA  | JX559223          |                                            |
| 5,521     | TGCAGGAGCTAGA  | JN019019          |                                            |
| 3,590     | TGACGGAGCTACA  | JN018895          |                                            |
| 3,389     | TGCAGGAGCTACA  | JQ580281          |                                            |
| 2,045     | TGCAGGAGCTAGG  | JN019001          |                                            |
| 1,477     | TGACGGAACTACA  | JN019018          | 99.7                                       |
| 737       | TGACGGATTTACA  | JN860307          |                                            |
| 716       | TGCAGGAGACGCA  | JN018476          |                                            |
| 362       | TGACGGAGCAACA  | JN018895          | 99.7                                       |
| 253       | TGACGGAGATACA  | NR_074565         |                                            |
| 208       | TAACGGAGCTACA  | JN018463          |                                            |
| 125       | TGCGGGAGACGCA  | JN018476          | 99.7                                       |
| 105       | TGACGGACTG-GA  | JN018894          | 98.0                                       |
| 85        | TGCAGGAGTTACA  | JN233061          | 99.4                                       |
| 82        | TGCAGGAGCTACG  | GQ348314          | 99.7                                       |
| 62        | TGACGGAGACGCA  | JQ800146          |                                            |
| 56        | CGACGGAGCTAGA  | JN018439          |                                            |
| 43        | TGCAGGAACTACA  | HQ203927          |                                            |
| 39        | TGCAGGAGATATA  | JX879002          |                                            |
| 38        | GCGCGGACTTATA  | JQ862019          | 96.3                                       |
| 32        | TTCAGGAGCATGA  | HQ326394          |                                            |
| 28        | TGCAGGGGTTACA  | JN233061          | 99.2                                       |
| 27        | TGCAGGAATTATA  | <u>AY172255</u>   | 99.2                                       |
| 24        | TGACGGAGTTACA  | EU491928          |                                            |
| 20        | TGCAGGATCTAGA  | JN019019          | 98.9                                       |
| 19        | TGCGGGAGCTAGA  | JN019019          | 99.7                                       |

Entropy graphs and abundance curves within each oligotype suggested entropy had been sufficiently explained, and that the oligotyping procedure was saturated (Fig. 4). These oligotypes all have the same taxonomic assignment of *Colwellia* and their nucleotide sequences are more than 97% similar. However, they have unique closest matches in the NCBI nr database, or are at most 96.3% similar to existing sequences in the database.

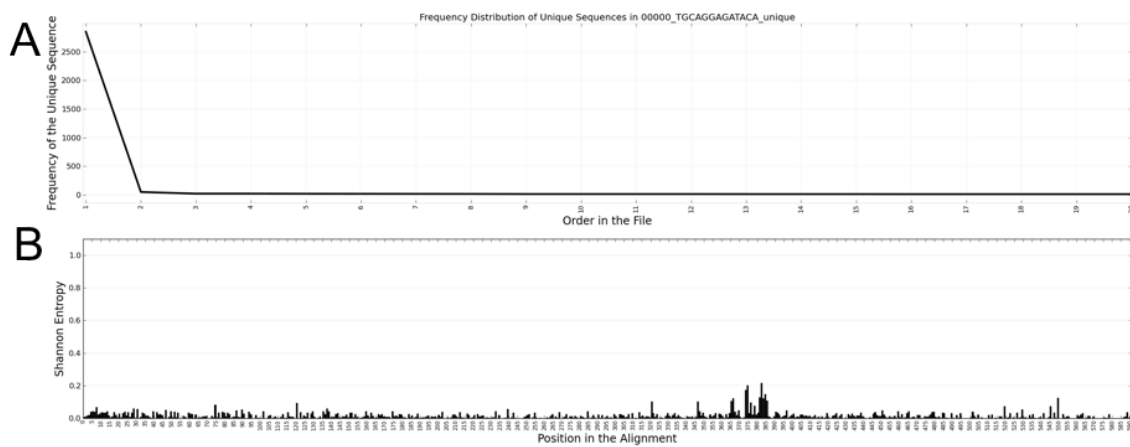

**Fig. 4.** Abundance distribution of sequences in the “TGCAGGAGATACA” oligotype of *Colwellia* sequences (A) and entropy values at each position (B). Profiles are similar for the other oligotypes.

## References

1. Eren AM, *et al.* (2013) Oligotyping: differentiating between closely related microbial taxa using 16S rRNA gene data. *Methods Ecol. Evol.* 4(12):1111–1119.
2. Sogin ML, *et al.* (2006) Microbial diversity in the deep sea and the underexplored “rare biosphere”. *Proc. Natl. Acad. Sci. USA* 103(32):12115-12120.
3. Huber JA, *et al.* (2007) Microbial Population Structures in the Deep Marine Biosphere. pp 97-100.
